# Supplementary material for: Effects of Bacillus velezensis FKM10 for Promoting the Growth of Malus hupehensis Rehd. and Inhibiting Fusarium verticillioides
Source: Front Microbiol. 2020 Jan 10;10:2889. doi: 10.3389/fmicb.2019.02889 (PMC6965166; doi:10.3389/fmicb.2019.02889)
Supplement: Supplementary file 2 [file Table_1.XLSX]

## Sheet: Supplementary Table 1
Supplementary Table 1. Microbial diversity index
	Sample	Valid sequences	ACE	Chao	Shannon	Simpson	OTUs
Bacteria	CK	184793	5571	5716	9.75	1	6167
	FKM10	250568	6079	6142	10.23	1	6090
Fungi	CK	161038	582	590	5.58	0.95	683
	FKM10	155139	602	604	5.36	0.94	665

## Sheet: Supplementary Table 2
Supplementary Table 2. Different expression genes of strain FKM10
seq_id	description	KEGG_GENE	logFC(DT/FKM10)
ATE50_RS03135	glycosyl transferase	tuaG	8.43
ATE50_RS03130	Teichuronic acid biosynthesis protein TuaF	tuaF	8.32
ATE50_RS03120	UDP-glucose 6-dehydrogenase	UGDH, ugd	8.21
ATE50_RS03115	glycosyl transferase family 1	K16697, tuaC	8.13
ATE50_RS18010	twin-arginine translocase TatA/TatE family subunit	tatA	8.07
ATE50_RS03140	teichuronic acid biosynthesis glycosyltransferase tuaH	tuaH	7.96
ATE50_RS18015	alkaline phosphatase	phoD	7.96
ATE50_RS07960	phosphate-binding protein	pstS	7.89
ATE50_RS03110	lipopolysaccharide biosynthesis protein	tuaB	7.77
ATE50_RS03125	Teichuronic acid biosynthesis protein TuaE	tuaE	7.75
ATE50_RS03105	UDP-phosphate N-acetylgalactosaminyl-1-phosphate transferase	_	7.66
ATE50_RS07980	phosphate ABC transporter ATP-binding protein	pstB	6.9
ATE50_RS07975	phosphate ABC transporter ATP-binding protein	pstB	6.58
ATE50_RS07970	phosphate ABC transporter%2C permease protein PstA	pstA	6.5
ATE50_RS07965	phosphate ABC transporter permease subunit PstC	pstC	6.31
ATE50_RS01875	hypothetical protein	_	6.24
ATE50_RS14770	alkaline phosphatase	E3.1.3.1, phoA, phoB	5.55
ATE50_RS06990	stage II sporulation protein B	spoIIB	5.54
ATE50_RS18005	twin-arginine translocase subunit TatC	tatC	5.46
ATE50_RS07110	intercompartmental signaling factor BofC	bofC	5.29
ATE50_RS18200	glycerophosphodiester phosphodiesterase	E3.1.4.46, glpQ, ugpQ	5.27
ATE50_RS13975	ornithine carbamoyltransferase	OTC, argF, argI	5.02
ATE50_RS13980	carbamoyl phosphate synthase large subunit	carB, CPA2	4.66
ATE50_RS08810	anti-sigma F factor	spoIIAB	4.34
ATE50_RS08805	anti-sigma F factor antagonist	spoIIAA	4.24
ATE50_RS08815	RNA polymerase sporulation sigma factor SigF	SIG3.4	4.2
ATE50_RS13990	aspartate aminotransferase family protein	E2.6.1.11, argD	4.03
ATE50_RS01880	levansucrase	licT, bglG	3.93
ATE50_RS11960	sigma-E processing peptidase SpoIIGA	spoIIGA	3.92
ATE50_RS00110	hypothetical protein	yfbK	3.81
ATE50_RS02395	MerR family transcriptional regulator	racA	3.72
ATE50_RS06350	argininosuccinate lyase	argH, ASL	3.65
ATE50_RS12915	hypothetical protein	_	3.64
ATE50_RS11965	peptidase S8	bpr	3.63
ATE50_RS00970	hypothetical protein	_	3.62
ATE50_RS13985	carbamoyl phosphate synthase small subunit	carA, CPA1	3.62
ATE50_RS15245	hypothetical protein	_	3.6
ATE50_RS11950	RNA polymerase sporulation sigma factor SigG	SIG3.4	3.57
ATE50_RS11955	RNA polymerase sporulation sigma factor SigE	SIG3.4	3.56
ATE50_RS09365	hypothetical protein	_	3.44
ATE50_RS00115	stage II sporulation protein E	spoIIE	3.43
ATE50_RS13995	acetylglutamate kinase	argB	3.37
ATE50_RS19055	YvrJ family protein	_	3.34
ATE50_RS09730	3-phytase	E3.1.3.8	3.32
ATE50_RS19490	hypothetical protein	_	3.3
ATE50_RS14005	N-acetyl-gamma-glutamyl-phosphate reductase	argC	3.25
ATE50_RS10485	choline esterase	_	3.21
ATE50_RS00965	hypothetical protein	_	3.15
ATE50_RS14000	bifunctional ornithine acetyltransferase/N-acetylglutamate synthase	argJ	3.09
ATE50_RS17795	antimicrobial peptide%2C Lci	_	3.08
ATE50_RS04495	DNA starvation/stationary phase protection protein	dps	3.04
ATE50_RS10735	chitin-binding protein	cpbD	3.03
ATE50_RS06345	argininosuccinate synthase	argG, ASS1	3.02
ATE50_RS05065	alanine dehydrogenase	ald	2.97
ATE50_RS10490	hypothetical protein	_	2.93
ATE50_RS02055	MFS transporter	_	2.9
ATE50_RS08315	sporulation transcription factor Spo0A	spo0A	2.87
ATE50_RS04230	peptidase M84	_	2.74
ATE50_RS10260	gamma-glutamyltransferase	ggt	2.72
ATE50_RS09825	hypothetical protein	_	2.64
ATE50_RS14260	hypothetical protein	_	2.63
ATE50_RS10725	peptidase G2	_	2.56
ATE50_RS04725	kinase	_	2.41
ATE50_RS04630	hypothetical protein	_	2.38
ATE50_RS09735	hypothetical protein	cgeB	2.36
ATE50_RS14045	proteinase inhibitor	_	2.35
ATE50_RS14555	hypothetical protein	_	2.32
ATE50_RS16505	hypothetical protein	_	2.29
ATE50_RS18340	glutamine--fructose-6-phosphate aminotransferase	glmS, GFPT	2.26
ATE50_RS19450	Fur-regulated basic protein FbpA	_	2.24
ATE50_RS10655	cytochrome C biogenesis protein CcdA	ccdA	2.23
ATE50_RS06255	TetR family transcriptional regulator	_	2.21
ATE50_RS13335	N-acetylmuramoyl-L-alanine amidase	E3.5.1.28A, cwlA, xlyA, xlyB	2.2
ATE50_RS01420	beta-glucanase	_	2.19
ATE50_RS04735	fructosamine deglycase	frlB	2.19
ATE50_RS13345	aspartate phosphatase	rapA, spo0L	2.17
ATE50_RS08130	DNA-binding anti-repressor SinI	sinI	2.13
ATE50_RS11110	stage V sporulation protein S	spoVS	2.09
ATE50_RS10650	two-component system response regulator	cheY	2.08
ATE50_RS14050	membrane protein	_	2.06
ATE50_RS14180	germination protein GerPE	gerPE	2.06
ATE50_RS18470	inorganic polyphosphate kinase	E3.1.3.25, IMPA, suhB	2.06
ATE50_RS02345	response regulator	spo0F	2.03
ATE50_RS18465	alcohol dehydrogenase	BDH, butB	2.02
ATE50_RS02390	transporter	K07088	2.02
ATE50_RS06180	SGNH/GDSL hydrolase family protein	_	2.01
ATE50_RS15095	phosphomethylpyrimidine synthase ThiC	thiC	2
ATE50_RS08740	L-asparaginase 1	E3.5.1.1, ansA, ansB	-2
ATE50_RS08741	hypothetical protein	_	-2
ATE50_RS08742	glyoxalase	_	-2
ATE50_RS08743	transporter	_	-2.01
ATE50_RS08744	hypothetical protein	_	-2.01
ATE50_RS08745	hypothetical protein	_	-2.01
ATE50_RS08746	tryptophan synthase subunit alpha	trpA	-2.02
ATE50_RS08747	transcriptional regulator	_	-2.02
ATE50_RS08748	very short patch repair endonuclease	vsr	-2.02
ATE50_RS08749	hypothetical protein	_	-2.03
ATE50_RS08750	heptaprenyl diphosphate synthase component II	hepST	-2.03
ATE50_RS08751	flagellar hook-length control protein FliK	fliK	-2.03
ATE50_RS08752	spore gernimation protein GerA	gerBC	-2.03
ATE50_RS08753	hypothetical protein	_	-2.04
ATE50_RS08754	hypothetical protein	_	-2.04
ATE50_RS08755	hypothetical protein	_	-2.04
ATE50_RS08756	hypothetical protein	_	-2.05
ATE50_RS08757	hypothetical protein	_	-2.05
ATE50_RS08758	protein liaG	liaG	-2.05
ATE50_RS08759	YlmC/YmxH family sporulation protein	_	-2.05
ATE50_RS08760	hypothetical protein	_	-2.05
ATE50_RS08761	hypothetical protein	marC	-2.06
ATE50_RS08762	mannitol-1-phosphate 5-dehydrogenase	mtlD	-2.06
ATE50_RS08763	formate/nitrite transporter	_	-2.07
ATE50_RS08764	capsular polysaccharide biosynthesis protein	pgsA, capA	-2.08
ATE50_RS08765	arabinose transporter permease	araQ	-2.08
ATE50_RS08766	N-acetylmuramoyl-L-alanine amidase	E3.5.1.28B, amiA, amiB, amiC	-2.08
ATE50_RS08767	polyketide synthase	_	-2.08
ATE50_RS08768	hypothetical protein	yraG	-2.08
ATE50_RS08769	50S ribosomal protein L4	RP-L4, MRPL4, rplD	-2.09
ATE50_RS08770	trehalose permease IIC protein	PTS-Tre-EIIB, treB	-2.09
ATE50_RS08771	tryptophan RNA-binding attenuator protein inhibitory protein	_	-2.09
ATE50_RS08772	membrane protein	_	-2.09
ATE50_RS08773	choline ABC transporter permease	opuBD	-2.09
ATE50_RS08774	polyketide synthase	_	-2.09
ATE50_RS08775	hypothetical protein	_	-2.09
ATE50_RS08776	polyketide synthase	_	-2.09
ATE50_RS08777	tRNA-Arg	_	-2.09
ATE50_RS08778	histidinol-phosphate transaminase	hisC	-2.1
ATE50_RS08779	phage portal protein	_	-2.1
ATE50_RS08780	hypothetical protein	_	-2.1
ATE50_RS08781	hypothetical protein	_	-2.11
ATE50_RS08782	flagellum-specific ATP synthase FliI	fliI	-2.12
ATE50_RS08783	hypothetical protein	_	-2.12
ATE50_RS08784	glycosyl transferase	_	-2.12
ATE50_RS08785	hypothetical protein	_	-2.12
ATE50_RS08786	flagellar assembly protein FliH	fliH	-2.14
ATE50_RS08787	magnesium transporter	_	-2.14
ATE50_RS08788	flagellar M-ring protein FliF	fliF	-2.15
ATE50_RS08789	CDP-glycerol--glycerophosphate glycerophosphotransferase	tagF	-2.15
ATE50_RS08790	cytochrome C biogenesis protein CcdC	_	-2.15
ATE50_RS08791	alpha%2Calpha-phosphotrehalase	treC	-2.15
ATE50_RS08792	30S ribosomal protein S14	RP-S14, MRPS14, rpsN	-2.15
ATE50_RS08793	sodium:proton antiporter	K07084	-2.16
ATE50_RS08794	MarR family transcriptional regulator	_	-2.16
ATE50_RS08795	50S ribosomal protein L17	RP-L17, MRPL17, rplQ	-2.17
ATE50_RS08796	hypothetical protein	_	-2.17
ATE50_RS08797	bacitracin ABC transporter ATP-binding protein	ABC-2.A	-2.17
ATE50_RS08798	hypothetical protein	_	-2.17
ATE50_RS08799	hypothetical protein	_	-2.18
ATE50_RS08800	Na+/H+ antiporter NhaC	nhaC	-2.19
ATE50_RS08801	hypothetical protein	_	-2.2
ATE50_RS08802	hypothetical protein	_	-2.2
ATE50_RS08803	hypothetical protein	_	-2.2
ATE50_RS08804	sulfonate ABC transporter substrate-binding protein	ssuA	-2.21
ATE50_RS08805	ABC transporter	ABC-2.CYL.A, cylA	-2.22
ATE50_RS08806	membrane protein	K07038	-2.22
ATE50_RS08807	flagellar motor switch protein FliG	fliG	-2.23
ATE50_RS08808	PTS mannose transporter subunit IIABC	PTS-Fru-EIIC, fruA	-2.23
ATE50_RS08809	hypothetical protein	_	-2.23
ATE50_RS08810	sodium:dicarboxylate symporter	K06956	-2.23
ATE50_RS08811	Fur-regulated basic protein FbpA	_	-2.24
ATE50_RS08812	N-acetyltransferase	_	-2.24
ATE50_RS08813	aspartate ammonia-lyase	aspA	-2.25
ATE50_RS08814	hypothetical protein	ABC-2.A	-2.25
ATE50_RS08815	amino acid ABC transporter substrate-binding protein	tcyK	-2.25
ATE50_RS08816	hypothetical protein	_	-2.26
ATE50_RS08817	PTS sugar transporter	PTS-Nag-EIIB, nagE	-2.26
ATE50_RS08818	DUF3918 domain-containing protein	_	-2.26
ATE50_RS08819	amino acid permease	_	-2.27
ATE50_RS08820	phosphoribosylformylglycinamidine synthase%2C purS protein	purL, PFAS	-2.27
ATE50_RS08821	phosphoribosylaminoimidazolesuccinocarboxamide synthase	purC	-2.27
ATE50_RS08822	hypothetical protein	_	-2.27
ATE50_RS08823	DNA-binding response regulator	K02477	-2.28
ATE50_RS08824	stage III sporulation protein AD	spoIIIAD	-2.28
ATE50_RS08825	two-component sensor histidine kinase	_	-2.29
ATE50_RS08826	poly-gamma-glutamate biosynthesis protein PgsC	_	-2.29
ATE50_RS08827	carbamoyl-phosphate synthase	_	-2.29
ATE50_RS08828	osmoprotectant ABC transporter substrate-binding protein	opuC	-2.29
ATE50_RS08829	osmoprotectant ABC transporter substrate-binding protein	opuC	-2.3
ATE50_RS08830	beta 1%2C4 glucosyltransferase	_	-2.3
ATE50_RS08831	phage portal protein	_	-2.3
ATE50_RS08832	beta-ketoacyl-[acyl-carrier-protein] synthase II	fabF	-2.31
ATE50_RS08833	tRNA-Phe	_	-2.31
ATE50_RS08834	fatty acid desaturase	FAD6, desA	-2.31
ATE50_RS08835	PTS system%2C cellobiose-specific IIC component	PTS-Cel-EIIC, celB	-2.32
ATE50_RS08836	xanthine dehydrogenase	xdhC	-2.32
ATE50_RS08837	cation transporter	_	-2.32
ATE50_RS08838	betaine-aldehyde dehydrogenase	betB, gbsA	-2.33
ATE50_RS08839	germination protein	gerAC	-2.33
ATE50_RS08840	Fur-regulated basic protein FbpB	_	-2.33
ATE50_RS08841	arginine:ornithine antiporter	arcD, lysl, lysP	-2.34
ATE50_RS08842	50S ribosomal protein L2	RP-L2, MRPL2, rplB	-2.35
ATE50_RS08843	hypothetical protein	_	-2.35
ATE50_RS08844	lantibiotic protection ABC transporter permease	ABC-2.P	-2.35
ATE50_RS08845	tRNA-Ser	_	-2.36
ATE50_RS08846	50S ribosomal protein L23	RP-L23, MRPL23, rplW	-2.37
ATE50_RS08847	ABC transporter substrate-binding protein	ABC.PE.S	-2.37
ATE50_RS08848	hypothetical protein	_	-2.37
ATE50_RS08849	hypothetical protein	_	-2.37
ATE50_RS08850	tRNA-Tyr	_	-2.37
ATE50_RS08851	hypothetical protein	_	-2.37
ATE50_RS08852	membrane protein	_	-2.38
ATE50_RS08853	L-glutamate gamma-semialdehyde dehydrogenase	E1.2.1.88	-2.39
ATE50_RS08854	tRNA-Glu	_	-2.39
ATE50_RS08855	MFS transporter	dgoT	-2.4
ATE50_RS08856	AI-2E family transporter	_	-2.4
ATE50_RS08857	hypothetical protein	_	-2.4
ATE50_RS08858	bacitracin ABC transporter ATP-binding protein	ABC.CD.A	-2.41
ATE50_RS08859	ATP-binding protein	K09384	-2.41
ATE50_RS08860	aldehyde oxidase	_	-2.41
ATE50_RS08861	alpha-glucosidase	E3.2.1.10	-2.41
ATE50_RS08862	choline ABC transporter permease	opuBD	-2.42
ATE50_RS08863	protein liaI	liaI	-2.42
ATE50_RS08864	flagellar hook-basal body complex protein FliE	fliE	-2.43
ATE50_RS08865	membrane protein	ABC-2.P	-2.43
ATE50_RS08866	protein LiaH	liaH	-2.43
ATE50_RS08867	NAD(P)-dependent oxidoreductase	_	-2.44
ATE50_RS08868	30S ribosomal protein S19	RP-S19, rpsS	-2.45
ATE50_RS08869	DNA-directed RNA polymerase subunit alpha	rpoA	-2.47
ATE50_RS08870	polyketide synthase	_	-2.47
ATE50_RS08871	hypothetical protein	_	-2.47
ATE50_RS08872	heptaprenyl diphosphate synthase subunit I	hepST	-2.48
ATE50_RS08873	diguanylate cyclase	ABC.PE.P	-2.48
ATE50_RS08874	hypothetical protein	_	-2.48
ATE50_RS08875	membrane protein	_	-2.48
ATE50_RS08876	replication ATP-dependent helicase	_	-2.5
ATE50_RS08877	endo-alpha-(1->5)-L-arabinanase	abnA_B	-2.5
ATE50_RS08878	30S ribosomal protein S11	RP-S11, MRPS11, rpsK	-2.51
ATE50_RS08879	flavodoxin	fldA, nifF, isiB	-2.52
ATE50_RS08880	DNA mismatch repair protein MutT	_	-2.52
ATE50_RS08881	hypothetical protein	ABC-2.A	-2.54
ATE50_RS08882	polyketide synthase	_	-2.54
ATE50_RS08883	hypothetical protein	_	-2.54
ATE50_RS08884	glycoside hydrolase 68 family protein	sacB	-2.55
ATE50_RS08885	transporter	ABC-2.CYL.P, cylB	-2.56
ATE50_RS08886	hypothetical protein	_	-2.56
ATE50_RS08887	hypothetical protein	_	-2.56
ATE50_RS08888	glycine/betaine ABC transporter ATP-binding protein	opuA	-2.57
ATE50_RS08889	amino acid ABC transporter substrate-binding protein	tcyJ	-2.57
ATE50_RS08890	ketoacyl-ACP synthase III	fabH	-2.58
ATE50_RS08891	spore coat protein	cotF	-2.59
ATE50_RS08892	(2Fe-2S)-binding protein	coxS	-2.59
ATE50_RS08893	hypothetical protein	_	-2.59
ATE50_RS08894	cysteine ABC transporter permease	tcyM	-2.6
ATE50_RS08895	16S rRNA methyltransferase	rsmC	-2.62
ATE50_RS08896	phosphoribosylformylglycinamidine synthase I	purL, PFAS	-2.63
ATE50_RS08897	hypothetical protein	_	-2.65
ATE50_RS08898	flagellar biosynthesis chaperone	fliJ	-2.65
ATE50_RS08899	50S ribosomal protein L22	RP-L22, MRPL22, rplV	-2.66
ATE50_RS08900	hypothetical protein	_	-2.66
ATE50_RS08901	stage III sporulation protein AC	spoIIIAC	-2.67
ATE50_RS08902	glutamine ABC transporter permease	ABC.GLN1.P	-2.69
ATE50_RS08903	glutamate dehydrogenase	gudB, rocG	-2.69
ATE50_RS08904	spore coat protein	cotM	-2.7
ATE50_RS08905	glycine/betaine ABC transporter ATP-binding protein	opuA	-2.71
ATE50_RS08906	spore gernimation protein	gerAB	-2.71
ATE50_RS08907	glucose-1-phosphate cytidylyltransferase	rfbF	-2.71
ATE50_RS08908	aspartate aminotransferase family protein	_	-2.71
ATE50_RS08909	50S ribosomal protein L7/L12	RP-L7, MRPL12, rplL	-2.72
ATE50_RS08910	amidophosphoribosyltransferase	purF, PPAT	-2.72
ATE50_RS08911	sulfonate ABC transporter ATP-binding protein	ssuB	-2.72
ATE50_RS08912	30S ribosomal protein S3	RP-S3, rpsC	-2.73
ATE50_RS08913	ketoacyl-ACP synthase III	fabH	-2.73
ATE50_RS08914	membrane protein	_	-2.73
ATE50_RS08915	DUF2292 domain-containing protein	_	-2.74
ATE50_RS08916	hypothetical protein	_	-2.74
ATE50_RS08917	YigZ family protein	_	-2.76
ATE50_RS08918	ABC transporter permease	ABC-2.P	-2.76
ATE50_RS08919	peptide ABC transporter permease	ABC.PE.P1	-2.76
ATE50_RS08920	30S ribosomal protein S13	RP-S13, rpsM	-2.77
ATE50_RS08921	hypothetical protein	_	-2.79
ATE50_RS08922	BltR family transcriptional regulator	_	-2.79
ATE50_RS08923	acetyl-CoA acetyltransferase	E2.3.1.9, atoB	-2.79
ATE50_RS08924	transcriptional regulator	_	-2.85
ATE50_RS08925	hypothetical protein	_	-2.85
ATE50_RS08926	amino acid ABC transporter ATPase	ABC.GLN1.A	-2.86
ATE50_RS08927	phosphoribosylamine--glycine ligase	purD	-2.87
ATE50_RS08928	polyketide synthase	_	-2.87
ATE50_RS08929	sporulation protein	_	-2.87
ATE50_RS08930	hydrolase	K01436	-2.87
ATE50_RS08931	ring-cleaving dioxygenase	K15975	-2.88
ATE50_RS08932	hypothetical protein	_	-2.91
ATE50_RS08933	cysteine ABC transporter permease	tcyL	-2.92
ATE50_RS08934	polyketide synthase	_	-2.92
ATE50_RS08935	hypothetical protein	_	-2.92
ATE50_RS08936	3-hydroxybutyryl-CoA dehydrogenase	paaH, hbd, fadB, mmgB	-2.94
ATE50_RS08937	50S ribosomal protein L10	RP-L10, MRPL10, rplJ	-2.96
ATE50_RS08938	sporulation protein	yrbB, coxA	-2.97
ATE50_RS08939	NAD(P)H nitroreductase	K15976	-2.97
ATE50_RS08940	FbpB family small basic protein	_	-2.97
ATE50_RS08941	tRNA-Val	_	-2.98
ATE50_RS08942	xanthine dehydrogenase	mocA	-2.99
ATE50_RS08943	glutaminase	glsA, GLS	-3
ATE50_RS08944	LysR family transcriptional regulator	_	-3.01
ATE50_RS08945	hypothetical protein	_	-3.01
ATE50_RS08946	phosphoribosylformylglycinamidine cyclo-ligase	purM	-3.02
ATE50_RS08947	sporulation transcriptional regulator SpoIIID	spoIIID	-3.02
ATE50_RS08948	glyoxalase	K07032	-3.02
ATE50_RS08949	N-acetyltransferase	_	-3.03
ATE50_RS08950	adenylate kinase	adk, AK	-3.06
ATE50_RS08951	preprotein translocase subunit SecY	secY	-3.07
ATE50_RS08952	AbrB/MazE/SpoVT family DNA-binding domain-containing protein	abrB	-3.11
ATE50_RS08953	50S ribosomal protein L16	RP-L16, MRPL16, rplP	-3.12
ATE50_RS08954	spore germination protein	gerKA	-3.12
ATE50_RS08955	50S ribosomal protein L15	RP-L15, MRPL15, rplO	-3.13
ATE50_RS08956	hypothetical protein	_	-3.14
ATE50_RS08957	type I methionyl aminopeptidase	map	-3.14
ATE50_RS08958	polypeptide N-acetylgalactosaminyltransferase	_	-3.15
ATE50_RS08959	bifunctional phosphoribosylaminoimidazolecarboxamide formyltransferase/inosine monophosphate cyclohydrolase	purH	-3.2
ATE50_RS08960	levanase	levB	-3.23
ATE50_RS08961	phosphoribosylformylglycinamidine synthase II	purL, PFAS	-3.23
ATE50_RS08962	glucose starvation-inducible protein B	K06884	-3.27
ATE50_RS08963	50S ribosomal protein L36	RP-L36, MRPL36, rpmJ	-3.28
ATE50_RS08964	EamA family transporter	_	-3.29
ATE50_RS08965	cysteine synthase	mccA	-3.29
ATE50_RS08966	PTS mannitol transporter subunit IIB	PTS-Mtl-EIIC, mtlA	-3.31
ATE50_RS08967	30S ribosomal protein S5	RP-S5, MRPS5, rpsE	-3.31
ATE50_RS08968	translation initiation factor IF-1	infA	-3.32
ATE50_RS08969	hypothetical protein	_	-3.32
ATE50_RS08970	hypothetical protein	_	-3.34
ATE50_RS08971	hypothetical protein	_	-3.35
ATE50_RS08972	50S ribosomal protein L30	RP-L30, MRPL30, rpmD	-3.36
ATE50_RS08973	amino acid permease	yxeN	-3.37
ATE50_RS08974	amino acid ABC transporter substrate-binding protein	yxeM	-3.39
ATE50_RS08975	amino acid ABC transporter ATP-binding protein	yxeO	-3.4
ATE50_RS08976	50S ribosomal protein L5	RP-L5, MRPL5, rplE	-3.41
ATE50_RS08977	demethylmenaquinone methyltransferase	ubiE	-3.42
ATE50_RS08978	50S ribosomal protein L14	RP-L14, MRPL14, rplN	-3.42
ATE50_RS08979	30S ribosomal protein S8	RP-S8, rpsH	-3.42
ATE50_RS08980	50S ribosomal protein L18	RP-L18, MRPL18, rplR	-3.42
ATE50_RS08981	phosphoribosylglycinamide formyltransferase	purN	-3.43
ATE50_RS08982	SAM-dependent methyltransferase	_	-3.44
ATE50_RS08983	MFS transporter	NRT, narK, nrtP, nasA	-3.44
ATE50_RS08984	LLM class flavin-dependent oxidoreductase	_	-3.46
ATE50_RS08985	50S ribosomal protein L6	RP-L6, MRPL6, rplF	-3.47
ATE50_RS08986	hypothetical protein	_	-3.47
ATE50_RS08987	nitric oxide dioxygenase	hmp, YHB1	-3.5
ATE50_RS08988	50S ribosomal protein L29	RP-L29, rpmC	-3.56
ATE50_RS08989	hypothetical protein	_	-3.57
ATE50_RS08990	hypothetical protein	_	-3.59
ATE50_RS08991	30S ribosomal protein S17	RP-S17, MRPS17, rpsQ	-3.6
ATE50_RS08992	50S ribosomal protein L24	RP-L24, MRPL24, rplX	-3.63
ATE50_RS08993	30S ribosomal protein S14	RP-S14, MRPS14, rpsN	-3.71
ATE50_RS08994	cystathionine gamma-synthase	mccB	-3.71
ATE50_RS08995	N-acetyltransferase	_	-3.72
ATE50_RS08996	flavodoxin	fldA, nifF, isiB	-3.82
ATE50_RS08997	2%2C3-dihydro-2%2C3-dihydroxybenzoate dehydrogenase	entA	-3.86
ATE50_RS08998	transcriptional regulator	K07105	-4.03
ATE50_RS08999	antiholin	lrgB	-4.06
ATE50_RS09000	protein mbtH	mbtH, nocI	-4.19
ATE50_RS09001	membrane protein	_	-4.35
ATE50_RS09002	aspartate kinase	lysC	-4.4
ATE50_RS09003	antiholin LrgA	lrgA	-4.46
ATE50_RS09004	isochorismate synthase EntC	entC	-4.65
ATE50_RS09005	nitrate reductase subunit alpha	narG	-4.68
ATE50_RS09006	MFS transporter	ydjE	-4.78
ATE50_RS09007	2%2C3-dihydroxybenzoate-AMP ligase	entE, dhbE, vibE, mxcE	-4.92
ATE50_RS09008	non-ribosomal peptide synthetase	dhbF	-5.03
ATE50_RS09009	respiratory nitrate reductase subunit gamma	narI	-5.13
ATE50_RS09010	sodium:alanine symporter	glnT	-5.28
ATE50_RS09011	isochorismatase	entB, dhbB, vibB, mxcF	-5.34
ATE50_RS09012	nitrate reductase molybdenum cofactor assembly chaperone	narJ	-5.42
ATE50_RS09013	nitrate reductase subunit beta	narH	-5.55
ATE50_RS09014	hypothetical protein	_	-5.69
ATE50_RS09015	cysteine desulfurase	iscS, NFS1	-5.77
ATE50_RS09016	histidinol dehydrogenase	hisD	-5.88
ATE50_RS09017	ATP phosphoribosyltransferase regulatory subunit	hisZ	-6.25
ATE50_RS09018	ATP phosphoribosyltransferase	hisG	-6.32
ATE50_RS09019	imidazole glycerol phosphate synthase subunit HisH	hisH	-6.52
ATE50_RS09020	1-(5-phosphoribosyl)-5-((5-phosphoribosylamino)methylideneamino)imidazole-4-carboxamide isomerase	hisA	-6.57
ATE50_RS09021	imidazole glycerol phosphate synthase cyclase subunit	hisF	-6.79
ATE50_RS09022	imidazoleglycerol-phosphate dehydratase	hisB	-6.8
ATE50_RS09023	bifunctional phosphoribosyl-AMP cyclohydrolase/phosphoribosyl-ATP diphosphatase	hisIE	-7.04
ATE50_RS09024	L-aspartate oxidase	nadB	-7.78
ATE50_RS09025	nicotinate-nucleotide diphosphorylase (carboxylating)	nadC, QPRT	-8.36
ATE50_RS09026	quinolinate synthetase	nadA	-8.45
ATE50_RS09027	peptidoglycan-binding protein	safA	-8.69

## Sheet: Supplementary Table 3
Supplementary Table 3. Different expression genes of F.verticillioides
seq_id	Putative function	Gene name	log2 fold change
c2174_g1	hypothetical protein FVEG_09815 [Fusarium verticillioides 7600]	_	10.5
c7909_g1	hypothetical protein FVEG_13746 [Fusarium verticillioides 7600]	_	9.55
c20838_g1	hypothetical protein FVEG_08445 [Fusarium verticillioides 7600]	SLC20A, PIT	7.12
c18450_g2	glutathione S-transferase [Fusarium verticillioides 7600]	gst	7
c18788_g1	phenazine biosynthesis protein [Fusarium verticillioides 7600]	_	6.79
c5225_g2	hypothetical protein FVEG_13186 [Fusarium verticillioides 7600]	E2.3.1.-	6.78
c5833_g1	PiT family inorganic phosphate transporter [Fusarium verticillioides 7600]	SLC20A, PIT	6.66
c6020_g1	hypothetical protein FVEG_13163 [Fusarium verticillioides 7600]	_	6.36
c10479_g1	hypothetical protein FVEG_03931 [Fusarium verticillioides 7600]	_	6.21
c22009_g1	hypothetical protein FVEG_12307 [Fusarium verticillioides 7600]	_	6.16
c13969_g1	hypothetical protein FVEG_08829 [Fusarium verticillioides 7600]	_	6.11
c10285_g1	hypothetical protein FVEG_17540 [Fusarium verticillioides 7600]	_	6.06
c7549_g1	sulfite oxidase [Fusarium verticillioides 7600]	SUOX	5.75
c4098_g1	hypothetical protein FVEG_09816 [Fusarium verticillioides 7600]	_	5.73
c20922_g1	hypothetical protein FVEG_00271 [Fusarium verticillioides 7600]	E3.1.3.2	5.62
c4068_g2	14-alpha demethylase [Fusarium verticillioides]	CYP51	5.57
c13519_g1	3-hydroxybutyrate dehydrogenase [Fusarium verticillioides 7600]	_	5.56
c15697_g1	hypothetical protein FVEG_10928 [Fusarium verticillioides 7600]	_	5.54
c957_g1	hypothetical protein FVEG_01652 [Fusarium verticillioides 7600]	BCS1	5.54
c20749_g1	hypothetical protein FVEG_11440 [Fusarium verticillioides 7600]	_	5.53
c11008_g1	hypothetical protein FVEG_04564 [Fusarium verticillioides 7600]	_	5.46
c12040_g1	hypothetical protein FVEG_03268 [Fusarium verticillioides 7600]	_	5.46
c1814_g1	hypothetical protein FVEG_10799 [Fusarium verticillioides 7600]	_	5.44
c1196_g1	membrane dipeptidase [Fusarium verticillioides 7600]	DPEP	5.43
c8637_g1	hypothetical protein FVEG_13745 [Fusarium verticillioides 7600]	_	5.37
c2815_g1	hypothetical protein FVEG_00221 [Fusarium verticillioides 7600]	_	5.33
c11172_g1	hypothetical protein FVEG_08320 [Fusarium verticillioides 7600]	_	5.33
c21241_g1	hypothetical protein FVEG_13771 [Fusarium verticillioides 7600]	_	5.3
c21263_g1	hypothetical protein FVEG_03370 [Fusarium verticillioides 7600]	_	5.21
c5335_g1	hypothetical protein FVEG_00220 [Fusarium verticillioides 7600]	_	5.21
c528_g1	hypothetical protein FVEG_10004 [Fusarium verticillioides 7600]	_	5.21
c3792_g1	hypothetical protein FVEG_09840 [Fusarium verticillioides 7600]	_	5.19
c18300_g1	hypothetical protein FVEG_10826 [Fusarium verticillioides 7600]	_	5.18
c6659_g1	hypothetical protein FVEG_05531 [Fusarium verticillioides 7600]	_	5.11
c15829_g1	hypothetical protein FVEG_11884 [Fusarium verticillioides 7600]	_	5.1
c15846_g1	hypothetical protein FVEG_07889 [Fusarium verticillioides 7600]	_	5.09
c6830_g1	magnesium-translocating P-type ATPase [Fusarium verticillioides 7600]	_	5.04
c1243_g1	hypothetical protein FVEG_02408 [Fusarium verticillioides 7600]	_	5
c6705_g1	hypothetical protein FVEG_14631 [Fusarium verticillioides 7600]	_	5
c13853_g1	taurine dioxygenase [Fusarium verticillioides 7600]	JLP1	4.99
c14080_g1	hypothetical protein FVEG_17121 [Fusarium verticillioides 7600]	_	4.94
c21218_g1	adenosine deaminase [Fusarium verticillioides 7600]	add, ADA	4.94
c13141_g1	hypothetical protein FVEG_10707 [Fusarium verticillioides 7600]	_	4.92
c16025_g1	acyl-CoA dehydrogenase [Fusarium verticillioides 7600]	E1.3.99.-	4.92
c17313_g1	hypothetical protein FVEG_10679 [Fusarium verticillioides 7600]	_	4.91
c4322_g1	hypothetical protein FVEG_12887 [Fusarium verticillioides 7600]	LAG1	4.87
c2441_g1	hypothetical protein FVEG_10007 [Fusarium verticillioides 7600]	_	4.87
c4585_g1	hypothetical protein FVEG_00219 [Fusarium verticillioides 7600]	_	4.87
c19204_g1	hypothetical protein FVEG_10577 [Fusarium verticillioides 7600]	_	4.83
c16193_g1	hypothetical protein FVEG_12181 [Fusarium verticillioides 7600]	_	4.83
c18267_g1	ribonucleoside-triphosphate reductase [Fusarium verticillioides 7600]	nrdD	4.7
c20846_g1	hypothetical protein FVEG_12763 [Fusarium verticillioides 7600]	_	4.68
c1371_g1	hypothetical protein FVEG_12254 [Fusarium verticillioides 7600]	E5.1.1.13	4.68
c7498_g1	betaine-aldehyde dehydrogenase [Fusarium verticillioides 7600]	betB, gbsA	4.66
c7835_g1	hypothetical protein FVEG_07428 [Fusarium verticillioides 7600]	_	4.65
c1309_g1	hypothetical protein FVEG_12724 [Fusarium verticillioides 7600]	_	4.65
c13788_g1	hypothetical protein FVEG_07231 [Fusarium verticillioides 7600]	_	4.64
c5471_g1	hypothetical protein FVEG_02431 [Fusarium verticillioides 7600]	_	4.63
c19006_g1	hypothetical protein FVEG_12920 [Fusarium verticillioides 7600]	_	4.58
c11712_g1	hypothetical protein FVEG_09064 [Fusarium verticillioides 7600]	_	4.57
c8188_g1	hypothetical protein FVEG_09613 [Fusarium verticillioides 7600]	E3.5.3.1, rocF, arg	4.57
c5471_g2	hypothetical protein FVEG_02431 [Fusarium verticillioides 7600]	_	4.56
c20920_g1	hypothetical protein FVEG_10828 [Fusarium verticillioides 7600]	_	4.55
c6705_g2	hypothetical protein FVEG_14631 [Fusarium verticillioides 7600]	_	4.5
c1064_g1	hypothetical protein FVEG_06528 [Fusarium verticillioides 7600]	_	4.5
c21509_g1	hypothetical protein FVEG_12613 [Fusarium verticillioides 7600]	_	4.48
c4040_g1	hypothetical protein FVEG_11214 [Fusarium verticillioides 7600]	_	4.47
c14405_g1	hypothetical protein FVEG_01633 [Fusarium verticillioides 7600]	_	4.47
c7402_g4	MULTISPECIES: ATP-dependent isoleucine adenylase [Bacillus]	K15668, ppsE, fenB	4.46
c229_g1	hypothetical protein FVEG_13819 [Fusarium verticillioides 7600]	_	4.44
c15805_g1	hypothetical protein FVEG_13160 [Fusarium verticillioides 7600]	_	4.42
c4741_g1	hypothetical protein FVEG_10832 [Fusarium verticillioides 7600]	_	4.41
c21448_g1	hypothetical protein FVEG_10852 [Fusarium verticillioides 7600]	fabG	4.4
c8455_g1	hypothetical protein FVEG_10530 [Fusarium verticillioides 7600]	_	4.4
c19781_g1	hypothetical protein FVEG_08792 [Fusarium verticillioides 7600]	_	4.4
c6542_g1	hypothetical protein FVEG_13727 [Fusarium verticillioides 7600]	_	4.39
c1043_g1	hypothetical protein FVEG_10688 [Fusarium verticillioides 7600]	K09983	4.39
c10650_g1	phosphate:H+ symporter [Fusarium verticillioides 7600]	PHO84	4.38
c614_g1	hypothetical protein FVEG_16113 [Fusarium verticillioides 7600]	_	4.38
c21438_g1	hypothetical protein FVEG_13268 [Fusarium verticillioides 7600]	_	4.36
c7633_g1	hypothetical protein FVEG_12627 [Fusarium verticillioides 7600]	_	4.34
c2452_g2	hypothetical protein FVEG_16985 [Fusarium verticillioides 7600]	_	4.33
c6569_g1	hypothetical protein FVEG_12678 [Fusarium verticillioides 7600]	_	4.32
c6221_g1	hypothetical protein FVEG_06444 [Fusarium verticillioides 7600]	_	4.31
c5839_g2	hypothetical protein FVEG_17392 [Fusarium verticillioides 7600]	_	4.28
c867_g1	hypothetical protein FVEG_02135 [Fusarium verticillioides 7600]	_	4.27
c4219_g1	hypothetical protein FVEG_10437 [Fusarium verticillioides 7600]	E1.1.1.9	4.25
c2776_g1	hypothetical protein FVEG_12555 [Fusarium verticillioides 7600]	_	4.25
c453_g1	hypothetical protein FVEG_14869 [Fusarium verticillioides 7600]	_	4.22
c6295_g1	indoleamine 2,3-dioxygenase [Fusarium verticillioides 7600]	INDO	4.22
c21192_g1	hypothetical protein FVEG_04320 [Fusarium verticillioides 7600]	CES2	4.22
c21047_g1	hypothetical protein FVEG_02431 [Fusarium verticillioides 7600]	_	4.21
c2387_g1	hypothetical protein FVEG_09311 [Fusarium verticillioides 7600]	_	4.2
c4212_g1	hypothetical protein FVEG_03741 [Fusarium verticillioides 7600]	_	4.18
c4685_g1	hypothetical protein FVEG_17310 [Fusarium verticillioides 7600]	_	4.18
c8384_g1	hypothetical protein FVEG_16303 [Fusarium verticillioides 7600]	_	4.18
c6087_g1	hypothetical protein FVEG_13013 [Fusarium verticillioides 7600]	REI1	4.17
c1134_g1	hypothetical protein FVEG_16737 [Fusarium verticillioides 7600]	_	4.16
c5657_g1	hypothetical protein FVEG_16900 [Fusarium verticillioides 7600]	_	4.16
c10871_g1	hypothetical protein FVEG_11622 [Fusarium verticillioides 7600]	EBP	4.15
c1823_g2	hypothetical protein FVEG_11292 [Fusarium verticillioides 7600]	_	4.15
c1272_g1	adenosine deaminase [Fusarium verticillioides 7600]	add, ADA	4.14
c1898_g1	hypothetical protein FVEG_13429 [Fusarium verticillioides 7600]	_	4.14
c5712_g1	hypothetical protein FVEG_09019 [Fusarium verticillioides 7600]	_	4.13
c15640_g1	hypothetical protein FVEG_13002 [Fusarium verticillioides 7600]	_	4.12
c16000_g1	hypothetical protein FVEG_16349 [Fusarium verticillioides 7600]	_	4.11
c2585_g2	hypothetical protein FVEG_09020 [Fusarium verticillioides 7600]	_	4.11
c21025_g1	hypothetical protein FVEG_11205 [Fusarium verticillioides 7600]	_	4.1
c8575_g1	Ham1 family protein [Fusarium verticillioides 7600]	ITPA	4.1
c6274_g1	hypothetical protein FVEG_04432 [Fusarium verticillioides 7600]	_	4.09
c4691_g1	hypothetical protein FVEG_00308 [Fusarium verticillioides 7600]	BTS, CLN3	4.05
c16671_g1	L-fuculose-phosphate aldolase [Fusarium verticillioides 7600]	_	4.04
c3597_g1	hypothetical protein FVEG_00028 [Fusarium verticillioides 7600]	_	4.03
c15866_g1	hypothetical protein FVEG_11094 [Fusarium verticillioides 7600]	_	3.99
c21152_g1	hypothetical protein FVEG_02445 [Fusarium verticillioides 7600]	_	3.98
c12871_g1	hypothetical protein FVEG_11433 [Fusarium verticillioides 7600]	_	3.97
c21529_g1	hypothetical protein FVEG_13374 [Fusarium verticillioides 7600]	_	3.96
c7965_g1	hypothetical protein FVEG_04355 [Fusarium verticillioides 7600]	YARS, tyrS	3.94
c5631_g1	hypothetical protein FVEG_03188 [Fusarium verticillioides 7600]	_	3.94
c18048_g1	argininosuccinate synthase [Fusarium verticillioides 7600]	argG, ASS1	3.93
c2273_g2	homocitrate synthase, mitochondrial [Fusarium verticillioides 7600]	LYS21, LYS20	3.93
c13330_g1	hypothetical protein FVEG_00832 [Fusarium verticillioides 7600]	rimJ	3.93
c11427_g1	hypothetical protein FVEG_12719 [Fusarium verticillioides 7600]	_	3.92
c8456_g1	endoglucanase [Fusarium verticillioides 7600]	_	3.91
c2644_g1	hypothetical protein FVEG_06767 [Fusarium verticillioides 7600]	_	3.91
c16864_g1	hypothetical protein FVEG_08713 [Fusarium verticillioides 7600]	_	3.89
c21229_g1	hypothetical protein FVEG_12928 [Fusarium verticillioides 7600]	E3.1.3.2	3.88
c13783_g1	hypothetical protein FVEG_17236 [Fusarium verticillioides 7600]	_	3.85
c6780_g1	ATPase [Fusarium verticillioides 7600]	_	3.83
c3173_g1	hypothetical protein FVEG_10962 [Fusarium verticillioides 7600]	_	3.83
c2357_g1	hypothetical protein FVEG_03664 [Fusarium verticillioides 7600]	_	3.82
c21321_g1	hypothetical protein FVEG_13414 [Fusarium verticillioides 7600]	_	3.82
c7654_g1	hypothetical protein FVEG_06902 [Fusarium verticillioides 7600]	_	3.82
c16206_g1	hypothetical protein FVEG_07683 [Fusarium verticillioides 7600]	_	3.81
c16176_g1	hypothetical protein FVEG_15301 [Fusarium verticillioides 7600]	_	3.81
c1271_g2	hypothetical protein FVEG_15775 [Fusarium verticillioides 7600]	_	3.8
c6021_g1	hypothetical protein FVEG_09947 [Fusarium verticillioides 7600]	_	3.78
c2585_g1	hypothetical protein FVEG_09020 [Fusarium verticillioides 7600]	_	3.78
c18058_g1	hypothetical protein FVEG_07260 [Fusarium verticillioides 7600]	_	3.77
c10668_g1	phenazine biosynthesis protein [Fusarium verticillioides 7600]	_	3.76
c4409_g1	hypothetical protein FVEG_05829 [Fusarium verticillioides 7600]	_	3.76
c2476_g1	hypothetical protein FVEG_10943 [Fusarium verticillioides 7600]	pabAB	3.75
c5668_g1	hypothetical protein FVEG_11910 [Fusarium verticillioides 7600]	_	3.73
c3658_g1	hypothetical protein FVEG_10530 [Fusarium verticillioides 7600]	_	3.73
c8270_g1	hypothetical protein FVEG_12770 [Fusarium verticillioides 7600]	_	3.71
c5712_g2	hypothetical protein FVEG_09019 [Fusarium verticillioides 7600]	_	3.7
c5244_g1	diaminopimelate epimerase [Fusarium verticillioides 7600]	dapF	3.69
c5657_g2	hypothetical protein FVEG_16900 [Fusarium verticillioides 7600]	_	3.66
c13677_g1	hypothetical protein FVEG_16701 [Fusarium verticillioides 7600]	_	3.66
c18428_g1	hypothetical protein FVEG_06235 [Fusarium verticillioides 7600]	_	3.64
c18834_g1	haloacid dehalogenase, type II [Fusarium verticillioides 7600]	E3.8.1.2	3.63
c7977_g1	hypothetical protein FVEG_17402 [Fusarium verticillioides 7600]	_	3.63
c2922_g1	hypothetical protein FVEG_11073 [Fusarium verticillioides 7600]	_	3.63
c11785_g1	hypothetical protein FVEG_03706 [Fusarium verticillioides 7600]	_	3.63
c7796_g1	hypothetical protein FVEG_10800 [Fusarium verticillioides 7600]	_	3.6
c14131_g1	alkanesulfonate monooxygenase [Fusarium verticillioides 7600]	ssuD	3.59
c3336_g1	hypothetical protein FVEG_07926 [Fusarium verticillioides 7600]	_	3.58
c14552_g1	hypothetical protein FVEG_13185 [Fusarium verticillioides 7600]	_	3.58
c2449_g2	hypothetical protein FVEG_09679 [Fusarium verticillioides 7600]	_	3.57
c4521_g1	hypothetical protein FVEG_11604 [Fusarium verticillioides 7600]	_	3.56
c10956_g1	alkanesulfonate monooxygenase [Fusarium verticillioides 7600]	_	3.56
c18400_g1	hypothetical protein FVEG_07737 [Fusarium verticillioides 7600]	_	3.55
c2031_g1	hypothetical protein FVEG_12287 [Fusarium verticillioides 7600]	_	3.54
c15696_g1	hypothetical protein FVEG_10076 [Fusarium verticillioides 7600]	_	3.53
c6223_g1	hypothetical protein FVEG_12312 [Fusarium verticillioides 7600]	_	3.52
c22087_g1	hypothetical protein FVEG_10152 [Fusarium verticillioides 7600]	POA1	3.52
c6267_g1	hypothetical protein FVEG_06766 [Fusarium verticillioides 7600]	_	3.51
c4386_g1	2-haloacid dehalogenase [Fusarium verticillioides 7600]	E3.8.1.2	3.48
c16723_g1	hypothetical protein FVEG_13175 [Fusarium verticillioides 7600]	_	3.48
c21147_g1	3-hydroxybutyrate dehydrogenase [Fusarium verticillioides 7600]	_	3.48
c8560_g1	hypothetical protein FVEG_05516 [Fusarium verticillioides 7600]	_	3.47
c14127_g1	hypothetical protein FVEG_12723 [Fusarium verticillioides 7600]	_	3.47
c13933_g1	hypothetical protein FVEG_08652 [Fusarium verticillioides 7600]	_	3.47
c13088_g1	choline dehydrogenase [Fusarium verticillioides 7600]	_	3.46
c6804_g1	PiT family inorganic phosphate transporter [Fusarium verticillioides 7600]	SLC20A, PIT	3.45
c11558_g1	hypothetical protein FVEG_08378 [Fusarium verticillioides 7600]	_	3.45
c21969_g1	hypothetical protein FVEG_12683 [Fusarium verticillioides 7600]	_	3.45
c6920_g2	hypothetical protein FVEG_05503 [Fusarium verticillioides 7600]	_	3.44
c1326_g1	hypothetical protein FVEG_03656 [Fusarium verticillioides 7600]	_	3.44
c4641_g1	hypothetical protein FVEG_06039 [Fusarium verticillioides 7600]	E3.1.3.8	3.43
c21626_g1	hypothetical protein FVEG_07455 [Fusarium verticillioides 7600]	FBA, fbaA	3.43
c2343_g1	hypothetical protein FVEG_10817 [Fusarium verticillioides 7600]	_	3.4
c4397_g1	hypothetical protein FVEG_13136 [Fusarium verticillioides 7600]	_	3.39
c1697_g1	hypothetical protein FVEG_09942 [Fusarium verticillioides 7600]	_	3.38
c2534_g1	hypothetical protein FVEG_12696 [Fusarium verticillioides 7600]	_	3.38
c2455_g1	D-aminopeptidase [Fusarium verticillioides 7600]	dmpA	3.36
c4264_g1	hypothetical protein FVEG_06613 [Fusarium verticillioides 7600]	_	3.36
c1339_g3	hypothetical protein FVEG_13309 [Fusarium verticillioides 7600]	_	3.36
c5545_g1	hypothetical protein FVEG_06372 [Fusarium verticillioides 7600]	_	3.35
c5345_g1	hypothetical protein FVEG_11071 [Fusarium verticillioides 7600]	_	3.35
c11378_g1	hypothetical protein FVEG_15779 [Fusarium verticillioides 7600]	_	3.31
c21508_g1	hypothetical protein FVEG_17463 [Fusarium verticillioides 7600]	idnO	3.3
c1104_g1	hypothetical protein FVEG_12929 [Fusarium verticillioides 7600]	_	3.3
c4602_g1	hypothetical protein FVEG_10798 [Fusarium verticillioides 7600]	_	3.3
c19699_g1	hypothetical protein FVEG_16300 [Fusarium verticillioides 7600]	_	3.3
c7873_g2	hypothetical protein FVEG_12009 [Fusarium verticillioides 7600]	_	3.29
c4373_g1	hypothetical protein FVEG_06512 [Fusarium verticillioides 7600]	E3.2.1.25, MANBA, manB	3.27
c18386_g1	hypothetical protein FVEG_17177 [Fusarium verticillioides 7600]	TDP2	3.26
c18764_g1	hypothetical protein FVEG_12016 [Fusarium verticillioides 7600]	_	3.26
c8582_g1	hypothetical protein FVEG_11203 [Fusarium verticillioides 7600]	_	3.26
c22095_g1	hypothetical protein FVEG_12576 [Fusarium verticillioides 7600]	_	3.25
c5244_g2	diaminopimelate epimerase [Fusarium verticillioides 7600]	dapF	3.24
c3346_g1	hypothetical protein FVEG_11829 [Fusarium verticillioides 7600]	_	3.23
c13847_g1	hypothetical protein FVEG_08728 [Fusarium verticillioides 7600]	_	3.23
c155_g1	hypothetical protein FVEG_13769 [Fusarium verticillioides 7600]	_	3.22
c14059_g1	hypothetical protein FVEG_03666 [Fusarium verticillioides 7600]	nagZ	3.21
c10931_g1	hypothetical protein FVEG_16015 [Fusarium verticillioides 7600]	_	3.21
c10413_g1	hypothetical protein FVEG_12933 [Fusarium verticillioides 7600]	YAT	3.2
c8700_g1	hypothetical protein FVEG_16910 [Fusarium verticillioides 7600]	_	3.2
c6592_g1	hypothetical protein FVEG_11614 [Fusarium verticillioides 7600]	_	3.2
c13313_g1	hypothetical protein FVEG_12390 [Fusarium verticillioides 7600]	_	3.2
c20827_g1	hypothetical protein FVEG_14923 [Fusarium verticillioides 7600]	_	3.19
c7208_g1	hypothetical protein FVEG_05681 [Fusarium verticillioides 7600]	_	3.18
c1295_g1	hypothetical protein FVEG_08522 [Fusarium verticillioides 7600]	_	3.17
c5600_g1	hypothetical protein FVEG_16303 [Fusarium verticillioides 7600]	gpmB	3.15
c2546_g1	hypothetical protein FVEG_02431 [Fusarium verticillioides 7600]	_	3.15
c13338_g1	2-isopropylmalate synthase [Fusarium verticillioides 7600]	leuA	3.14
c16356_g1	hypothetical protein FVEG_09936 [Fusarium verticillioides 7600]	trxA	3.13
c6322_g1	hypothetical protein FVEG_12013 [Fusarium verticillioides 7600]	_	3.12
c5948_g1	hypothetical protein FVEG_12010 [Fusarium verticillioides 7600]	_	3.11
c6132_g2	hypothetical protein FVEG_12518 [Fusarium verticillioides 7600]	_	3.11
c20911_g1	hypothetical protein FVEG_10578 [Fusarium verticillioides 7600]	_	3.08
c21209_g1	hypothetical protein FVEG_17593 [Fusarium verticillioides 7600]	_	3.08
c5951_g1	hypothetical protein FVEG_14585 [Fusarium verticillioides 7600]	_	3.07
c5682_g1	haloacetate dehalogenase [Fusarium verticillioides 7600]	dehH	3.07
c137_g1	hypothetical protein FVEG_13128 [Fusarium verticillioides 7600]	_	3.07
c5633_g1	hypothetical protein FVEG_05103 [Fusarium verticillioides 7600]	_	3.05
c18373_g1	hypothetical protein FVEG_13514 [Fusarium verticillioides 7600]	_	3.04
c5429_g1	hypothetical protein FVEG_03508 [Fusarium verticillioides 7600]	_	3.04
c13748_g1	hypothetical protein FVEG_15186 [Fusarium verticillioides 7600]	_	3.04
c18533_g1	hypothetical protein FVEG_08283 [Fusarium verticillioides 7600]	_	3.03
c7641_g1	hypothetical protein FVEG_06179 [Fusarium verticillioides 7600]	_	3.03
c10859_g1	hypothetical protein FVEG_11127 [Fusarium verticillioides 7600]	KEX1	3.03
c2177_g1	hypothetical protein FVEG_07739 [Fusarium verticillioides 7600]	_	3.03
c5476_g1	hypothetical protein FVEG_01718 [Fusarium verticillioides 7600]	_	3.03
c7797_g1	hypothetical protein FVEG_12378 [Fusarium verticillioides 7600]	_	3.02
c16174_g1	hypothetical protein FOXB_10650 [Fusarium oxysporum Fo5176]	_	3.02
c6501_g1	hypothetical protein FVEG_09144 [Fusarium verticillioides 7600]	_	3.02
c2398_g1	hypothetical protein FVEG_16176 [Fusarium verticillioides 7600]	_	3.02
c16164_g1	hypothetical protein FVEG_08727 [Fusarium verticillioides 7600]	_	3.02
c1544_g1	hypothetical protein FVEG_09769 [Fusarium verticillioides 7600]	_	3.02
c11224_g1	hypothetical protein FVEG_10125 [Fusarium verticillioides 7600]	_	3.02
c2024_g1	hypothetical protein FVEG_13824 [Fusarium verticillioides 7600]	_	3.01
c5839_g1	hypothetical protein FVEG_17392 [Fusarium verticillioides 7600]	_	3
c697_g1	ankyrin repeat protein nuc-2 [Fusarium verticillioides 7600]	PHO81	2.99
c6508_g1	hypothetical protein FVEG_07622 [Fusarium verticillioides 7600]	_	2.99
c1366_g1	hypothetical protein FVEG_06513 [Fusarium verticillioides 7600]	_	2.99
c7064_g2	alcohol dehydrogenase [Fusarium verticillioides 7600]	_	2.98
c10639_g1	hypothetical protein FVEG_12948 [Fusarium verticillioides 7600]	_	2.97
c15473_g1	carbonic anhydrase [Fusarium verticillioides 7600]	cynT, can	2.96
c18393_g1	hypothetical protein FVEG_03061 [Fusarium verticillioides 7600]	_	2.96
c3133_g1	hypothetical protein FVEG_10406 [Fusarium verticillioides 7600]	_	2.95
c4873_g1	hypothetical protein FVEG_17335 [Fusarium verticillioides 7600]	_	2.95
c11721_g1	hypothetical protein FVEG_11744 [Fusarium verticillioides 7600]	_	2.95
c3485_g1	hypothetical protein FVEG_08643 [Fusarium verticillioides 7600]	_	2.95
c3914_g1	hypothetical protein FVEG_03667 [Fusarium verticillioides 7600]	_	2.94
c18396_g1	hypothetical protein FVEG_08672 [Fusarium verticillioides 7600]	_	2.93
c11384_g1	hypothetical protein FVEG_12736 [Fusarium verticillioides 7600]	_	2.93
c22228_g1	alpha-amylase [Fusarium verticillioides 7600]	E3.2.1.1, amyA, malS	2.93
c19806_g1	hypothetical protein FVEG_15834 [Fusarium verticillioides 7600]	_	2.92
c12964_g1	alkanesulfonate monooxygenase [Fusarium verticillioides 7600]	ssuD	2.92
c3864_g1	hypothetical protein FVEG_11838 [Fusarium verticillioides 7600]	_	2.92
c18504_g1	hypothetical protein FVEG_15327 [Fusarium verticillioides 7600]	_	2.91
c5180_g1	mitochondrial chaperone BCS1 [Fusarium verticillioides 7600]	_	2.9
c6268_g1	hypothetical protein FVEG_16332 [Fusarium verticillioides 7600]	_	2.9
c536_g1	hypothetical protein FVEG_12330 [Fusarium verticillioides 7600]	_	2.9
c5681_g1	hypothetical protein FVEG_17139 [Fusarium verticillioides 7600]	_	2.89
c4642_g1	alcohol dehydrogenase (NADP+) [Fusarium verticillioides 7600]	AKR1A1, adh	2.88
c6004_g1	hypothetical protein FVEG_15212 [Fusarium verticillioides 7600]	_	2.86
c10235_g1	hypothetical protein FVEG_03195 [Fusarium verticillioides 7600]	_	2.85
c3896_g1	hypothetical protein FVEG_13770 [Fusarium verticillioides 7600]	_	2.84
c2814_g1	hypothetical protein FVEG_09913 [Fusarium verticillioides 7600]	_	2.83
c2449_g1	hypothetical protein FVEG_09679 [Fusarium verticillioides 7600]	_	2.83
c21405_g1	hypothetical protein FVEG_15056 [Fusarium verticillioides 7600]	_	2.83
c21153_g1	hypothetical protein FVEG_03226 [Fusarium verticillioides 7600]	_	2.82
c7206_g1	hypothetical protein FVEG_16973 [Fusarium verticillioides 7600]	_	2.81
c21437_g1	hypothetical protein FVEG_17503 [Fusarium verticillioides 7600]	_	2.81
c7056_g1	hypothetical protein FVEG_02437 [Fusarium verticillioides 7600]	_	2.8
c3106_g1	NCS1 family nucleobase:cation symporter-1 [Fusarium verticillioides 7600]	TC.NCS1	2.79
c15450_g1	threonine ammonia-lyase, biosynthetic [Fusarium verticillioides 7600]	E4.3.1.19, ilvA, tdcB	2.78
c10856_g1	hypothetical protein FVEG_08868 [Fusarium verticillioides 7600]	_	2.78
c1379_g1	hypothetical protein FVEG_12074 [Fusarium verticillioides 7600]	_	2.78
c5815_g1	hypothetical protein FVEG_05682 [Fusarium verticillioides 7600]	_	2.78
c2699_g1	hypothetical protein FVEG_15673 [Fusarium verticillioides 7600]	_	2.77
c19873_g1	hypothetical protein FVEG_01733 [Fusarium verticillioides 7600]	_	2.77
c21760_g1	hypothetical protein FVEG_02341 [Fusarium verticillioides 7600]	guaA, GMPS	2.76
c15720_g1	hypothetical protein FVEG_05579 [Fusarium verticillioides 7600]	_	2.76
c6612_g1	hypothetical protein FVEG_13289 [Fusarium verticillioides 7600]	_	2.76
c15733_g1	hypothetical protein FVEG_09581 [Fusarium verticillioides 7600]	_	2.75
c4958_g1	hypothetical protein FVEG_11079 [Fusarium verticillioides 7600]	_	2.75
c9226_g1	hypothetical protein FVEG_10003 [Fusarium verticillioides 7600]	_	2.74
c354_g1	hypothetical protein FVEG_10709 [Fusarium verticillioides 7600]	_	2.74
c874_g1	hypothetical protein FVEG_14111 [Fusarium verticillioides 7600]	_	2.73
c15937_g1	hypothetical protein FVEG_03537 [Fusarium verticillioides 7600]	_	2.72
c5166_g1	hypothetical protein FVEG_10850 [Fusarium verticillioides 7600]	_	2.72
c5764_g1	hypothetical protein FVEG_03269 [Fusarium verticillioides 7600]	TC.POT	2.71
c4091_g1	primary-amine oxidase [Fusarium verticillioides 7600]	AOC3, AOC2, tynA	2.71
c2033_g1	hypothetical protein FVEG_12319 [Fusarium verticillioides 7600]	_	2.7
c6595_g1	hypothetical protein FVEG_01528 [Fusarium verticillioides 7600]	_	2.69
c3695_g1	hypothetical protein FVEG_14663 [Fusarium verticillioides 7600]	_	2.69
c2887_g1	hypothetical protein FVEG_16853 [Fusarium verticillioides 7600]	_	2.69
c3802_g1	hypothetical protein FVEG_03748 [Fusarium verticillioides 7600]	_	2.69
c11858_g1	hypothetical protein FVEG_09329 [Fusarium verticillioides 7600]	_	2.69
c7434_g1	hypothetical protein FVEG_04214 [Fusarium verticillioides 7600]	_	2.68
c20730_g1	hypothetical protein FVEG_15465 [Fusarium verticillioides 7600]	_	2.68
c4898_g1	hypothetical protein FVEG_05912 [Fusarium verticillioides 7600]	_	2.68
c2261_g1	hypothetical protein FVEG_07419 [Fusarium verticillioides 7600]	_	2.68
c1823_g1	hypothetical protein FVEG_11292 [Fusarium verticillioides 7600]	_	2.68
c5674_g1	hypothetical protein FVEG_05922 [Fusarium verticillioides 7600]	_	2.67
c1800_g1	hypothetical protein FVEG_16893 [Fusarium verticillioides 7600]	_	2.67
c6307_g1	hypothetical protein FVEG_10279 [Fusarium verticillioides 7600]	_	2.67
c5822_g1	hypothetical protein FVEG_11883 [Fusarium verticillioides 7600]	_	2.67
c7489_g1	hypothetical protein FVEG_04206 [Fusarium verticillioides 7600]	E3.2.1.101	2.66
c4574_g1	hypothetical protein FVEG_13324 [Fusarium verticillioides 7600]	_	2.66
c5121_g2	hypothetical protein FVEG_11572 [Fusarium verticillioides 7600]	_	2.66
c17301_g1	hypothetical protein FVEG_15933 [Fusarium verticillioides 7600]	_	2.66
c4895_g1	hypothetical protein FVEG_07114 [Fusarium verticillioides 7600]	_	2.65
c11079_g1	hypothetical protein FVEG_10776 [Fusarium verticillioides 7600]	_	2.65
c10310_g1	hypothetical protein FVEG_01761 [Fusarium verticillioides 7600]	_	2.65
c4407_g2	hypothetical protein FVEG_02265 [Fusarium verticillioides 7600]	_	2.65
c5108_g1	hypothetical protein FVEG_13832 [Fusarium verticillioides 7600]	_	2.65
c6598_g1	hypothetical protein FVEG_01425 [Fusarium verticillioides 7600]	PHO84	2.64
c14322_g1	hypothetical protein FVEG_12723 [Fusarium verticillioides 7600]	_	2.64
c16323_g1	hypothetical protein FVEG_11308 [Fusarium verticillioides 7600]	K07140	2.63
c2359_g1	hypothetical protein FVEG_10973 [Fusarium verticillioides 7600]	_	2.63
c5611_g1	hypothetical protein FVEG_12199 [Fusarium verticillioides 7600]	_	2.63
c15840_g1	hypothetical protein FVEG_16916 [Fusarium verticillioides 7600]	_	2.62
c10728_g1	hypothetical protein FVEG_09732 [Fusarium verticillioides 7600]	_	2.62
c3930_g1	hypothetical protein FVEG_03195 [Fusarium verticillioides 7600]	_	2.62
c11054_g1	hypothetical protein FVEG_14088 [Fusarium verticillioides 7600]	_	2.61
c5715_g1	phospholipase C [Fusarium verticillioides 7600]	plcC	2.6
c913_g1	hypothetical protein FVEG_04331 [Fusarium verticillioides 7600]	_	2.58
c18866_g1	hypothetical protein FVEG_02409 [Fusarium verticillioides 7600]	_	2.58
c1256_g1	hypothetical protein FVEG_00401 [Fusarium verticillioides 7600]	_	2.58
c2142_g2	hypothetical protein FVEG_16833 [Fusarium verticillioides 7600]	_	2.57
c21085_g1	hypothetical protein FVEG_15259 [Fusarium verticillioides 7600]	_	2.57
c13159_g1	hypothetical protein FVEG_16006 [Fusarium verticillioides 7600]	K06910	2.56
c3307_g1	homocitrate synthase [Fusarium verticillioides 7600]	LYS21, LYS20	2.55
c7851_g1	hypothetical protein FVEG_07233 [Fusarium verticillioides 7600]	_	2.54
c2411_g1	hypothetical protein FVEG_03787 [Fusarium verticillioides 7600]	_	2.54
c4090_g1	alpha-galactosidase 2 [Fusarium verticillioides 7600]	E3.2.1.22B, galA, rafA	2.53
c15712_g1	hypothetical protein FVEG_10423 [Fusarium verticillioides 7600]	_	2.52
c23_g1	hypothetical protein FVEG_10569 [Fusarium verticillioides 7600]	_	2.52
c1480_g1	hypothetical protein FVEG_13162 [Fusarium verticillioides 7600]	_	2.52
c3094_g1	hypothetical protein FVEG_13710 [Fusarium verticillioides 7600]	_	2.52
c2655_g2	hypothetical protein FVEG_11065 [Fusarium verticillioides 7600]	_	2.52
c2508_g2	hypothetical protein FVEG_11929 [Fusarium verticillioides 7600]	_	2.52
c753_g1	hypothetical protein FVEG_10885 [Fusarium verticillioides 7600]	_	2.51
c5656_g1	RNA 3'-terminal phosphate cyclase [Fusarium verticillioides 7600]	RTCA, rtcA	2.5
c13190_g1	hypothetical protein FVEG_08784 [Fusarium verticillioides 7600]	_	2.5
c6383_g1	hypothetical protein FVEG_09941 [Fusarium verticillioides 7600]	_	2.5
c6153_g1	hypothetical protein FVEG_00218 [Fusarium verticillioides 7600]	_	2.5
c19978_g1	hypothetical protein FVEG_12737 [Fusarium verticillioides 7600]	_	2.5
c19147_g1	hypothetical protein FVEG_12696 [Fusarium verticillioides 7600]	_	2.5
c10404_g1	hypothetical protein FVEG_05156 [Fusarium verticillioides 7600]	_	2.49
c10464_g1	hypothetical protein FVEG_13158 [Fusarium verticillioides 7600]	_	2.48
c8058_g1	hypothetical protein FVEG_12726 [Fusarium verticillioides 7600]	_	2.48
c7038_g1	hypothetical protein FVEG_11430 [Fusarium verticillioides 7600]	_	2.47
c4583_g2	oxidoreductase [Fusarium verticillioides 7600]	_	2.47
c18392_g1	hypothetical protein FVEG_13548 [Fusarium verticillioides 7600]	_	2.46
c6545_g1	hypothetical protein FVEG_05146 [Fusarium verticillioides 7600]	_	2.46
c10708_g1	hypothetical protein FVEG_02453 [Fusarium verticillioides 7600]	_	2.46
c19138_g1	D-malate dehydrogenase [Fusarium verticillioides 7600]	ttuC, dmlA	2.46
c12035_g1	hypothetical protein FVEG_10120 [Fusarium verticillioides 7600]	_	2.46
c14040_g1	hypothetical protein FVEG_05953 [Fusarium verticillioides 7600]	_	2.45
c2465_g1	hypothetical protein FVEG_09329 [Fusarium verticillioides 7600]	_	2.45
c13634_g1	hypothetical protein FVEG_11516 [Fusarium verticillioides 7600]	_	2.45
c6253_g1	hypothetical protein FVEG_09329 [Fusarium verticillioides 7600]	_	2.44
c19441_g1	hypothetical protein FVEG_11931 [Fusarium verticillioides 7600]	APDC	2.44
c921_g1	hypothetical protein FVEG_11968 [Fusarium verticillioides 7600]	_	2.44
c8103_g1	hypothetical protein FVEG_17593 [Fusarium verticillioides 7600]	_	2.44
c18244_g1	hypothetical protein FVEG_04075 [Fusarium verticillioides 7600]	_	2.43
c2043_g1	hypothetical protein FVEG_06082 [Fusarium verticillioides 7600]	SLC40A1, FPN1	2.43
c14298_g1	hypothetical protein FVEG_16922 [Fusarium verticillioides 7600]	_	2.43
c5182_g1	hypothetical protein FVEG_11014 [Fusarium verticillioides 7600]	_	2.42
c8717_g1	hypothetical protein FVEG_02404 [Fusarium verticillioides 7600]	_	2.41
c4898_g3	hypothetical protein FVEG_05912 [Fusarium verticillioides 7600]	_	2.41
c21075_g1	hypothetical protein FVEG_12718 [Fusarium verticillioides 7600]	_	2.4
c4323_g1	hypothetical protein FVEG_08472 [Fusarium verticillioides 7600]	_	2.4
c10669_g1	hypothetical protein FVEG_16166 [Fusarium verticillioides 7600]	_	2.4
c11016_g1	hypothetical protein FVEG_17516 [Fusarium verticillioides 7600]	_	2.4
c820_g1	NADH dehydrogenase [Fusarium verticillioides 7600]	ndh	2.39
c1129_g1	hypothetical protein FVEG_09481 [Fusarium verticillioides 7600]	_	2.39
c856_g1	hypothetical protein FVEG_03302 [Fusarium verticillioides 7600]	_	2.39
c22396_g1	hypothetical protein FVEG_09016 [Fusarium verticillioides 7600]	_	2.39
c234_g1	hypothetical protein FVEG_08785 [Fusarium verticillioides 7600]	ERG5	2.38
c848_g1	hypothetical protein FVEG_11315 [Fusarium verticillioides 7600]	_	2.38
c8186_g1	hypothetical protein FVEG_13549 [Fusarium verticillioides 7600]	_	2.38
c11023_g1	aldehyde dehydrogenase (NAD+) [Fusarium verticillioides 7600]	E1.2.1.5	2.38
c4591_g1	endo-1,4-beta-xylanase [Fusarium verticillioides 7600]	E3.2.1.8, xynA	2.38
c2155_g2	hypothetical protein FVEG_04555 [Fusarium verticillioides 7600]	_	2.38
c1361_g1	hypothetical protein FVEG_09758 [Fusarium verticillioides 7600]	_	2.38
c10790_g1	hypothetical protein FVEG_12173 [Fusarium verticillioides 7600]	_	2.37
c4723_g1	cysteine dioxygenase [Fusarium verticillioides 7600]	CDO1	2.37
c4671_g1	hypothetical protein FVEG_15845 [Fusarium verticillioides 7600]	_	2.36
c12888_g1	acid phosphatase [Fusarium verticillioides 7600]	E3.1.3.2	2.36
c21830_g1	beta-lactamase [Fusarium verticillioides 7600]	_	2.36
c6697_g1	hypothetical protein FVEG_15541 [Fusarium verticillioides 7600]	_	2.36
c6907_g2	hypothetical protein FVEG_09773 [Fusarium verticillioides 7600]	YAT	2.36
c3268_g1	hypothetical protein FVEG_12580 [Fusarium verticillioides 7600]	_	2.36
c1664_g1	hypothetical protein FVEG_02348 [Fusarium verticillioides 7600]	_	2.36
c2960_g1	hypothetical protein FVEG_00959 [Fusarium verticillioides 7600]	_	2.35
c7528_g1	hypothetical protein FVEG_00268 [Fusarium verticillioides 7600]	_	2.35
c11724_g1	hypothetical protein FVEG_07041 [Fusarium verticillioides 7600]	K09788	2.35
c1014_g1	hypothetical protein FVEG_15895 [Fusarium verticillioides 7600]	_	2.35
c4923_g1	hypothetical protein FVEG_00874 [Fusarium verticillioides 7600]	_	2.35
c21033_g1	hypothetical protein FVEG_05278 [Fusarium verticillioides 7600]	_	2.34
c4165_g1	hypothetical protein FVEG_13662 [Fusarium verticillioides 7600]	DHCR7	2.34
c3464_g1	hypothetical protein FVEG_03706 [Fusarium verticillioides 7600]	_	2.34
c5653_g1	MFS transporter, PHS family, inorganic phosphate transporter [Fusarium verticillioides 7600]	PHO84	2.33
c14342_g1	hypothetical protein FVEG_10657 [Fusarium verticillioides 7600]	_	2.33
c9121_g1	ATPase [Fusarium verticillioides 7600]	_	2.33
c13195_g1	hypothetical protein FVEG_02879 [Fusarium verticillioides 7600]	_	2.33
c669_g1	hypothetical protein FVEG_03776 [Fusarium verticillioides 7600]	_	2.32
c16219_g1	hypothetical protein FVEG_09051 [Fusarium verticillioides 7600]	E2.3.1.-	2.32
c19270_g1	serine/threonine kinase 16 [Fusarium verticillioides 7600]	_	2.32
c11522_g1	hypothetical protein FVEG_12382 [Fusarium verticillioides 7600]	_	2.32
c1611_g1	hypothetical protein FVEG_13101 [Fusarium verticillioides 7600]	_	2.31
c732_g1	hypothetical protein FVEG_14096 [Fusarium verticillioides 7600]	_	2.31
c4054_g1	hypothetical protein FVEG_13241 [Fusarium verticillioides 7600]	_	2.31
c13534_g1	hypothetical protein FVEG_03433 [Fusarium verticillioides 7600]	_	2.3
c13317_g1	hypothetical protein FVEG_16830 [Fusarium verticillioides 7600]	_	2.3
c5074_g1	hypothetical protein FVEG_04920 [Fusarium verticillioides 7600]	_	2.3
c7185_g1	hypothetical protein FVEG_05814 [Fusarium verticillioides 7600]	_	2.3
c5216_g1	hypothetical protein FVEG_08629 [Fusarium verticillioides 7600]	_	2.3
c184_g1	hypothetical protein FVEG_10263 [Fusarium verticillioides 7600]	_	2.3
c6070_g1	hypothetical protein FVEG_09801 [Fusarium verticillioides 7600]	_	2.28
c577_g1	hypothetical protein FVEG_10767 [Fusarium verticillioides 7600]	_	2.28
c6054_g2	hypothetical protein FVEG_14103 [Fusarium verticillioides 7600]	_	2.28
c6829_g1	hypothetical protein FVEG_13636 [Fusarium verticillioides 7600]	_	2.28
c4440_g1	hypothetical protein FVEG_05800 [Fusarium verticillioides 7600]	SLC25A3, PHC, PIC	2.27
c5949_g1	hypothetical protein FVEG_13550 [Fusarium verticillioides 7600]	_	2.27
c10314_g1	hypothetical protein FVEG_09327 [Fusarium verticillioides 7600]	_	2.27
c10857_g1	hypothetical protein FVEG_13192 [Fusarium verticillioides 7600]	_	2.27
c581_g2	hypothetical protein FVEG_03990 [Fusarium verticillioides 7600]	_	2.27
c8020_g1	hypothetical protein FVEG_01621 [Fusarium verticillioides 7600]	_	2.27
c3076_g1	hypothetical protein FVEG_06612 [Fusarium verticillioides 7600]	_	2.26
c18349_g1	hypothetical protein FVEG_17501 [Fusarium verticillioides 7600]	E2.3.1.-	2.25
c152_g1	hypothetical protein FVEG_04704 [Fusarium verticillioides 7600]	_	2.25
c4616_g1	hypothetical protein FVEG_08545 [Fusarium verticillioides 7600]	_	2.25
c8862_g1	hypothetical protein FVEG_08568 [Fusarium verticillioides 7600]	_	2.25
c868_g1	hypothetical protein FVEG_11686 [Fusarium verticillioides 7600]	_	2.24
c21224_g1	hypothetical protein FVEG_08488 [Fusarium verticillioides 7600]	_	2.24
c2676_g1	hypothetical protein FVEG_10822 [Fusarium verticillioides 7600]	_	2.24
c661_g1	hypothetical protein FVEG_00392 [Fusarium verticillioides 7600]	_	2.24
c10641_g1	aquaporin rerated protein, other eukaryote [Fusarium verticillioides 7600]	AQPF	2.24
c7466_g1	14-alpha demethylase [Fusarium eburicol 14-alpha-demethylase [Fusarium verticillioides 7600]	CYP51	2.23
c15579_g1	hypothetical protein FVEG_02133 [Fusarium verticillioides 7600]	_	2.23
c763_g1	hypothetical protein FVEG_04893 [Fusarium verticillioides 7600]	_	2.23
c4172_g1	hypothetical protein FVEG_16279 [Fusarium verticillioides 7600]	_	2.23
c13432_g1	hypothetical protein FVEG_03990 [Fusarium verticillioides 7600]	_	2.22
c19600_g1	hypothetical protein FVEG_13039 [Fusarium verticillioides 7600]	_	2.22
c928_g1	prenylcysteine oxidase/farnesylcysteine lyase [Fusarium verticillioides 7600]	PCYOX1, FCLY	2.21
c4203_g1	hypothetical protein FVEG_03762 [Fusarium verticillioides 7600]	_	2.21
c4774_g1	hypothetical protein FVEG_06034 [Fusarium verticillioides 7600]	_	2.21
c1248_g1	hypothetical protein FVEG_12250 [Fusarium verticillioides 7600]	_	2.21
c237_g1	hypothetical protein FVEG_02661 [Fusarium verticillioides 7600]	_	2.2
c5627_g1	mesaconyl-C4 CoA hydratase [Fusarium verticillioides 7600]	_	2.2
c21243_g1	hypothetical protein FVEG_02420 [Fusarium verticillioides 7600]	_	2.2
c10246_g1	hypothetical protein FVEG_06563 [Fusarium verticillioides 7600]	_	2.19
c589_g1	hypothetical protein FVEG_11529 [Fusarium verticillioides 7600]	_	2.19
c4552_g1	hypothetical protein FVEG_03566 [Fusarium verticillioides 7600]	_	2.19
c20955_g1	pentafunctional AROM polypeptide [Fusarium verticillioides 7600]	ARO1	2.18
c18487_g1	hypothetical protein FVEG_04563 [Fusarium verticillioides 7600]	_	2.18
c5604_g1	hypothetical protein FVEG_01788 [Fusarium verticillioides 7600]	_	2.18
c737_g1	hypothetical protein FVEG_03733 [Fusarium verticillioides 7600]	ARN	2.18
c4745_g1	hypothetical protein FVEG_10781 [Fusarium verticillioides 7600]	_	2.18
c11793_g1	hypothetical protein FVEG_12236 [Fusarium verticillioides 7600]	_	2.18
c13206_g1	ATP-binding cassette, subfamily G (WHITE), member 2, PDR [Fusarium verticillioides 7600]	_	2.17
c3743_g1	hypothetical protein FVEG_04378 [Fusarium verticillioides 7600]	_	2.17
c18413_g1	hypothetical protein FVEG_13672 [Fusarium verticillioides 7600]	_	2.17
c11751_g1	hypothetical protein FVEG_08568 [Fusarium verticillioides 7600]	_	2.17
c13601_g1	hypothetical protein FVEG_03171 [Fusarium verticillioides 7600]	_	2.17
c4759_g2	hypothetical protein FVEG_06733 [Fusarium verticillioides 7600]	_	2.16
c1419_g1	hypothetical protein FVEG_00523 [Fusarium verticillioides 7600]	_	2.16
c3807_g1	hypothetical protein FVEG_02167 [Fusarium verticillioides 7600]	_	2.15
c13298_g1	CMGC/SRPK protein kinase [Fusarium verticillioides 7600]	E2.7.11.1	2.15
c2164_g1	hypothetical protein FVEG_11965 [Fusarium verticillioides 7600]	_	2.14
c1318_g1	hypothetical protein FVEG_06743 [Fusarium verticillioides 7600]	_	2.14
c4481_g1	hypothetical protein FVEG_09758 [Fusarium verticillioides 7600]	_	2.14
c20764_g1	alcohol dehydrogenase [Fusarium verticillioides 7600]	adhP	2.13
c13169_g1	prolyl oligopeptidase [Fusarium verticillioides 7600]	_	2.13
c6955_g1	hypothetical protein FVEG_06852 [Fusarium verticillioides 7600]	_	2.13
c18109_g1	hypothetical protein FVEG_00251 [Fusarium verticillioides 7600]	_	2.12
c15754_g1	hypothetical protein FVEG_12878 [Fusarium verticillioides 7600]	CTSA	2.12
c4751_g1	hypothetical protein FVEG_02166 [Fusarium verticillioides 7600]	_	2.12
c21379_g1	hypothetical protein FVEG_09524 [Fusarium verticillioides 7600]	_	2.11
c19544_g1	hypothetical protein FVEG_04566 [Fusarium verticillioides 7600]	_	2.11
c18085_g1	hypothetical protein FVEG_15746 [Fusarium verticillioides 7600]	_	2.1
c6539_g1	hypothetical protein FVEG_16792 [Fusarium verticillioides 7600]	_	2.1
c2543_g1	hypothetical protein FVEG_14895 [Fusarium verticillioides 7600]	ZNRF3	2.1
c4898_g2	hypothetical protein FVEG_05912 [Fusarium verticillioides 7600]	_	2.1
c6992_g1	hypothetical protein FVEG_15297 [Fusarium verticillioides 7600]	_	2.09
c5903_g1	hypothetical protein FVEG_12060 [Fusarium verticillioides 7600]	_	2.09
c1869_g1	hypothetical protein FVEG_10997 [Fusarium verticillioides 7600]	_	2.09
c10662_g1	hypothetical protein FVEG_06159 [Fusarium verticillioides 7600]	_	2.08
c4283_g1	hypothetical protein FVEG_04582, partial [Fusarium verticillioides 7600]	_	2.08
c5838_g1	hypothetical protein FVEG_16908 [Fusarium verticillioides 7600]	_	2.08
c8282_g1	hypothetical protein FVEG_03142 [Fusarium verticillioides 7600]	_	2.08
c16357_g1	hypothetical protein FVEG_17290 [Fusarium verticillioides 7600]	_	2.08
c10446_g1	hypothetical protein FVEG_11016 [Fusarium verticillioides 7600]	_	2.07
c2943_g1	hypothetical protein FVEG_07881 [Fusarium verticillioides 7600]	_	2.07
c4253_g2	hypothetical protein FVEG_07247 [Fusarium verticillioides 7600]	_	2.07
c2017_g1	hypothetical protein FVEG_17469 [Fusarium verticillioides 7600]	_	2.07
c7495_g1	C-5 sterol desaturase [Fusarium verticillioides 7600]	SC5DL, ERG3	2.06
c21013_g1	hypothetical protein FVEG_12227 [Fusarium verticillioides 7600]	_	2.06
c5956_g1	hypothetical protein FVEG_14689 [Fusarium verticillioides 7600]	_	2.06
c4303_g1	hypothetical protein FVEG_11316 [Fusarium verticillioides 7600]	_	2.06
c21501_g1	hypothetical protein FVEG_13443 [Fusarium verticillioides 7600]	_	2.06
c4253_g1	hypothetical protein FVEG_07247 [Fusarium verticillioides 7600]	_	2.06
c1667_g1	hypothetical protein FVEG_03821 [Fusarium verticillioides 7600]	_	2.06
c11154_g1	hypothetical protein FVEG_03883 [Fusarium verticillioides 7600]	_	2.05
c11283_g1	hypothetical protein FVEG_07574 [Fusarium verticillioides 7600]	K09958	2.05
c10750_g1	hypothetical protein FVEG_13486 [Fusarium verticillioides 7600]	_	2.05
c13320_g1	alpha-N-arabinofuranosidase [Fusarium verticillioides 7600]	_	2.04
c4229_g1	hypothetical protein FVEG_00929 [Fusarium verticillioides 7600]	_	2.04
c6176_g2	hypothetical protein FVEG_06619 [Fusarium verticillioides 7600]	_	2.04
c2016_g1	hypothetical protein FVEG_07087 [Fusarium verticillioides 7600]	_	2.04
c2578_g1	hypothetical protein FVEG_05608 [Fusarium verticillioides 7600]	PIPOX	2.03
c85_g1	hypothetical protein FVEG_02231 [Fusarium verticillioides 7600]	_	2.03
c7732_g1	hypothetical protein FVEG_10937 [Fusarium verticillioides 7600]	E3.1.27.1	2.03
c5185_g1	hypothetical protein FVEG_03830 [Fusarium verticillioides 7600]	GST, gst	2.03
c125_g1	hypothetical protein FVEG_13482 [Fusarium verticillioides 7600]	_	2.03
c19193_g1	primary-amine oxidase [Fusarium verticillioides 7600]	AOC3, AOC2, tynA	2.03
c8705_g1	hypothetical protein FVEG_08643 [Fusarium verticillioides 7600]	_	2.03
c15488_g1	hypothetical protein FVEG_11304 [Fusarium verticillioides 7600]	_	2.02
c4407_g1	hypothetical protein FVEG_02265 [Fusarium verticillioides 7600]	_	2.02
c13980_g1	hypothetical protein FVEG_03444 [Fusarium verticillioides 7600]	_	2.02
c4596_g1	hypothetical protein FVEG_06536 [Fusarium verticillioides 7600]	_	2.02
c20877_g1	hypothetical protein FVEG_17547 [Fusarium verticillioides 7600]	_	2.01
c10362_g1	methylcitrate synthase precursor [Fusarium verticillioides]	CS, gltA	2.01
c2653_g1	hypothetical protein FVEG_16948 [Fusarium verticillioides 7600]	_	2.01
c18233_g1	fructose-1,6-bisphosphatase [Fusarium verticillioides 7600]	E3.1.3.37	2
c21363_g1	kynureninase 2 [Fusarium verticillioides 7600]	KYNU, kynU	2
c2778_g1	hypothetical protein FVEG_11078 [Fusarium verticillioides 7600]	_	2
c15538_g1	catalase [Fusarium verticillioides 7600]	katE, CAT, catB, srpA	-2
c288_g1	hypothetical protein FVEG_05376 [Fusarium verticillioides 7600]	_	-2
c5322_g1	hypothetical protein FVEG_13827 [Fusarium verticillioides 7600]	_	-2.01
c1950_g1	hypothetical protein FVEG_01885 [Fusarium verticillioides 7600]	_	-2.01
c6403_g1	hypothetical protein FVEG_04245 [Fusarium verticillioides 7600]	_	-2.01
c5069_g2	hypothetical protein FVEG_09654 [Fusarium verticillioides 7600]	_	-2.01
c20176_g1	hypothetical protein FVEG_11328 [Fusarium verticillioides 7600]	_	-2.01
c15623_g1	hypothetical protein FVEG_02451 [Fusarium verticillioides 7600]	MSS51	-2.02
c6846_g2	hypothetical protein FVEG_11456 [Fusarium verticillioides 7600]	_	-2.03
c10822_g1	MFS transporter, SIT family, siderophore-iron:H+ symporter [Fusarium verticillioides 7600]	ARN	-2.04
c4500_g1	phosphatidylserine synthase [Fusarium verticillioides 7600]	CHO1, pssA	-2.05
c16656_g1	hypothetical protein FVEG_09915 [Fusarium verticillioides 7600]	_	-2.05
c21169_g1	glucan 1,6-alpha-glucosidase [Fusarium verticillioides 7600]	malZ	-2.05
c11537_g1	hypothetical protein FVEG_15119 [Fusarium verticillioides 7600]	_	-2.05
c21648_g1	hypothetical protein FVEG_14945 [Fusarium verticillioides 7600]	_	-2.05
c632_g1	hypothetical protein FVEG_02077 [Fusarium verticillioides 7600]	_	-2.06
c5317_g1	hypothetical protein FVEG_03609 [Fusarium verticillioides 7600]	_	-2.07
c19022_g1	hypothetical protein FVEG_08699 [Fusarium verticillioides 7600]	_	-2.07
c20815_g1	cysteine synthase A [Fusarium verticillioides 7600]	_	-2.07
c18108_g1	cellular nucleic acid-binding protein [Fusarium verticillioides 7600]	CNBP	-2.08
c6098_g1	cutinase transcription factor 1 beta [Fusarium verticillioides 7600]	_	-2.08
c5788_g1	hypothetical protein FVEG_06112 [Fusarium verticillioides 7600]	_	-2.1
c7150_g1	hypothetical protein FVEG_00539 [Fusarium verticillioides 7600]	_	-2.1
c3296_g1	hypothetical protein FVEG_12397 [Fusarium verticillioides 7600]	_	-2.1
c2323_g1	hypothetical protein FVEG_05779 [Fusarium verticillioides 7600]	_	-2.1
c4710_g1	hypothetical protein FVEG_05163 [Fusarium verticillioides 7600]	_	-2.11
c15604_g1	acyl-CoA dehydrogenase [Fusarium verticillioides 7600]	_	-2.11
c11077_g1	hypothetical protein FVEG_13167 [Fusarium verticillioides 7600]	_	-2.11
c6741_g1	CAMK/CAMK1/CAMK1-RCK protein kinase [Fusarium verticillioides 7600]	_	-2.12
c2313_g1	hypothetical protein FVEG_05606 [Fusarium verticillioides 7600]	_	-2.12
c4524_g1	hypothetical protein FVEG_09764 [Fusarium verticillioides 7600]	_	-2.12
c1230_g1	hypothetical protein FVEG_08095 [Fusarium verticillioides 7600]	_	-2.12
c2711_g2	hypothetical protein FVEG_01297 [Fusarium verticillioides 7600]	_	-2.12
c815_g1	hypothetical protein FVEG_01350 [Fusarium verticillioides 7600]	_	-2.13
c7104_g1	hypothetical protein FVEG_10757 [Fusarium verticillioides 7600]	_	-2.13
c9089_g1	copper/zinc superoxide dismutase [Fusarium verticillioides 7600]	_	-2.13
c4959_g1	NCS1 family nucleobase:cation symporter-1 [Fusarium verticillioides 7600]	_	-2.14
c7155_g2	hypothetical protein FVEG_14829 [Fusarium verticillioides 7600]	_	-2.14
c3378_g1	hypothetical protein FVEG_04090 [Fusarium verticillioides 7600]	_	-2.14
c6699_g1	hypothetical protein FVEG_11187 [Fusarium verticillioides 7600]	_	-2.17
c10225_g1	hypothetical protein FVEG_13534 [Fusarium verticillioides 7600]	_	-2.17
c21985_g1	hypothetical protein FVEG_09251 [Fusarium verticillioides 7600]	carT, CAO-2	-2.18
c1850_g1	hypothetical protein FVEG_10258 [Fusarium verticillioides 7600]	_	-2.19
c3114_g1	gluconate 5-dehydrogenase [Fusarium verticillioides 7600]	_	-2.2
c3288_g1	acetyltransferase [Fusarium verticillioides 7600]	E2.3.1.-	-2.21
c5532_g1	hypothetical protein FVEG_10718 [Fusarium verticillioides 7600]	AL2	-2.21
c2373_g1	hypothetical protein FVEG_10164 [Fusarium verticillioides 7600]	_	-2.21
c21924_g1	hypothetical protein FVEG_11060 [Fusarium verticillioides 7600]	_	-2.22
c5976_g1	hypothetical protein FVEG_17393 [Fusarium verticillioides 7600]	_	-2.22
c831_g1	inositol oxygenase [Fusarium verticillioides 7600]	MIOX	-2.22
c4255_g1	hypothetical protein FVEG_07480 [Fusarium verticillioides 7600]	_	-2.23
c19713_g1	hypothetical protein FVEG_08383 [Fusarium verticillioides 7600]	_	-2.23
c7958_g1	sodium/potassium-transporting ATPase subunit alpha [Fusarium verticillioides 7600]	ATP1A	-2.24
c21729_g1	hypothetical protein FVEG_15016 [Fusarium verticillioides 7600]	_	-2.24
c8401_g1	hypothetical protein FVEG_14703 [Fusarium verticillioides 7600]	_	-2.25
c18957_g1	hypothetical protein FVEG_01910 [Fusarium verticillioides 7600]	_	-2.26
c953_g1	hypothetical protein FVEG_08435 [Fusarium verticillioides 7600]	_	-2.27
c4366_g1	hypothetical protein FVEG_02285 [Fusarium verticillioides 7600]	_	-2.27
c11561_g1	hypothetical protein FVEG_08961 [Fusarium verticillioides 7600]	_	-2.27
c4477_g1	hypothetical protein FVEG_11876 [Fusarium verticillioides 7600]	_	-2.28
c13116_g1	hypothetical protein FVEG_16716 [Fusarium verticillioides 7600]	_	-2.28
c3207_g1	hypothetical protein FVEG_01332 [Fusarium verticillioides 7600]	_	-2.29
c4925_g1	hypothetical protein FVEG_04788 [Fusarium verticillioides 7600]	_	-2.29
c7956_g1	hypothetical protein FVEG_10501 [Fusarium verticillioides 7600]	_	-2.3
c467_g1	hypothetical protein FVEG_04179 [Fusarium verticillioides 7600]	AFG1, LACE1	-2.32
c6787_g1	hypothetical protein FVEG_05049 [Fusarium verticillioides 7600]	_	-2.32
c4909_g1	hypothetical protein FVEG_16519 [Fusarium verticillioides 7600]	_	-2.32
c5016_g1	ATP adenylyltransferase [Fusarium verticillioides 7600]	APA1_2	-2.36
c10439_g1	hypothetical protein FVEG_03582 [Fusarium verticillioides 7600]	LMBRD1	-2.38
c4859_g1	fructose-1,6-bisphosphatase [Fusarium verticillioides 7600]	FBP, fbp	-2.38
c1473_g1	hypothetical protein FVEG_13717 [Fusarium verticillioides 7600]	_	-2.38
c112_g1	hypothetical protein FVEG_06709 [Fusarium verticillioides 7600]	_	-2.39
c18470_g1	hypothetical protein FVEG_04006 [Fusarium verticillioides 7600]	_	-2.4
c7102_g1	hypothetical protein FVEG_13561 [Fusarium verticillioides 7600]	_	-2.4
c7131_g2	hypothetical protein FVEG_03365 [Fusarium verticillioides 7600]	_	-2.41
c1055_g2	beta-glucosidase G [Fusarium verticillioides 7600]	bglX	-2.41
c7014_g2	hypothetical protein FVEG_13574 [Fusarium verticillioides 7600]	_	-2.41
c16786_g1	hypothetical protein FVEG_16203 [Fusarium verticillioides 7600]	_	-2.42
c4648_g1	hypothetical protein FVEG_13082 [Fusarium verticillioides 7600]	_	-2.43
c4954_g1	hypothetical protein FVEG_09589 [Fusarium verticillioides 7600]	_	-2.43
c3050_g1	hypothetical protein FVEG_04848 [Fusarium verticillioides 7600]	_	-2.44
c7911_g1	hypothetical protein FVEG_13474 [Fusarium verticillioides 7600]	_	-2.44
c16239_g1	hypothetical protein FVEG_16058 [Fusarium verticillioides 7600]	_	-2.44
c2125_g1	phosphoadenosine phosphosulfate reductase [Fusarium verticillioides 7600]	cysH	-2.45
c13331_g1	hypothetical protein FVEG_04561 [Fusarium verticillioides 7600]	PAFAH	-2.46
c7693_g1	alpha-glucuronidase [Fusarium verticillioides 7600]	aguA	-2.46
c3716_g1	hypothetical protein FVEG_16255 [Fusarium verticillioides 7600]	_	-2.46
c15528_g1	hypothetical protein FVEG_09149 [Fusarium verticillioides 7600]	_	-2.5
c7014_g3	hypothetical protein FVEG_13574 [Fusarium verticillioides 7600]	_	-2.5
c986_g1	hypothetical protein FVEG_11190 [Fusarium verticillioides 7600]	_	-2.5
c8039_g1	hypothetical protein FVEG_13694 [Fusarium verticillioides 7600]	_	-2.51
c5726_g1	hypothetical protein FVEG_06282 [Fusarium verticillioides 7600]	_	-2.52
c1839_g1	hypothetical protein FVEG_11088 [Fusarium verticillioides 7600]	_	-2.52
c7068_g2	sulfite reductase (NADPH) flavoprotein alpha-component [Fusarium verticillioides 7600]	cysJ	-2.55
c6195_g1	hypothetical protein FVEG_00904 [Fusarium verticillioides 7600]	_	-2.55
c6733_g1	hypothetical protein FVEG_02176 [Fusarium verticillioides 7600]	_	-2.55
c4935_g1	hypothetical protein FVEG_00116 [Fusarium verticillioides 7600]	_	-2.55
c4555_g1	hypothetical protein FVEG_03264 [Fusarium verticillioides 7600]	_	-2.56
c3733_g1	hypothetical protein FVEG_03624 [Fusarium verticillioides 7600]	E3.2.1.14	-2.56
c13266_g1	hypothetical protein FVEG_10395 [Fusarium verticillioides 7600]	_	-2.57
c8648_g1	hypothetical protein FVEG_14832 [Fusarium verticillioides 7600]	_	-2.57
c3505_g1	hypothetical protein FVEG_06754 [Fusarium verticillioides 7600]	_	-2.58
c6630_g1	hypothetical protein FVEG_10876 [Fusarium verticillioides 7600]	_	-2.59
c10759_g1	hypothetical protein FVEG_02666 [Fusarium verticillioides 7600]	_	-2.6
c652_g1	hypothetical protein FVEG_08317 [Fusarium verticillioides 7600]	_	-2.61
c8797_g1	hypothetical protein FVEG_12070 [Fusarium verticillioides 7600]	_	-2.61
c7245_g1	cytochrome P450 55A1 [Fusarium verticillioides 7600]	CYP55	-2.62
c761_g1	hypothetical protein FVEG_15557 [Fusarium verticillioides 7600]	_	-2.65
c18514_g1	hypothetical protein FVEG_17565 [Fusarium verticillioides 7600]	_	-2.65
c3359_g1	hypothetical protein FVEG_11731 [Fusarium verticillioides 7600]	_	-2.67
c4617_g2	formate dehydrogenase [Fusarium verticillioides 7600]	FDH	-2.7
c6790_g1	potassium/sodium efflux P-type ATPase, fungal-type [Fusarium verticillioides 7600]	_	-2.7
c7014_g1	hypothetical protein FVEG_13574 [Fusarium verticillioides 7600]	_	-2.71
c6725_g1	hypothetical protein FVEG_01804 [Fusarium verticillioides 7600]	NPII	-2.71
c6348_g1	hypothetical protein FVEG_01803 [Fusarium verticillioides 7600]	_	-2.76
c2423_g1	hypothetical protein FVEG_04593 [Fusarium verticillioides 7600]	_	-2.77
c5585_g1	hypothetical protein FVEG_00147 [Fusarium verticillioides 7600]	_	-2.77
c5909_g1	chitin synthase D [Fusarium verticillioides]	CHS1	-2.79
c19098_g1	hypothetical protein FVEG_11852 [Fusarium verticillioides 7600]	_	-2.8
c4536_g1	hypothetical protein FVEG_10544 [Fusarium verticillioides 7600]	_	-2.8
c4204_g2	hypothetical protein FVEG_05066 [Fusarium verticillioides 7600]	_	-2.81
c18830_g1	MFS transporter, SP family, general alpha glucoside:H+ symporter [Fusarium verticillioides 7600]	MAL	-2.82
c5443_g1	hypothetical protein FVEG_01726 [Fusarium verticillioides 7600]	_	-2.83
c4121_g1	hypothetical protein FVEG_02596 [Fusarium verticillioides 7600]	_	-2.86
c13078_g1	stress-induced-phosphoprotein 1 [Fusarium verticillioides 7600]	STIP1	-2.91
c13238_g1	hypothetical protein FVEG_09866 [Fusarium verticillioides 7600]	MECR, NRBF1	-2.91
c22517_g1	hypothetical protein FVEG_08916 [Fusarium verticillioides 7600]	_	-2.91
c21194_g1	hypothetical protein FVEG_01041 [Fusarium verticillioides 7600]	IRG1	-2.92
c2264_g1	hypothetical protein FVEG_01299 [Fusarium verticillioides 7600]	_	-2.93
c757_g1	hypothetical protein FVEG_16273 [Fusarium verticillioides 7600]	_	-2.93
c4204_g1	hypothetical protein FVEG_05066 [Fusarium verticillioides 7600]	_	-2.94
c8312_g1	hypothetical protein FVEG_09359 [Fusarium verticillioides 7600]	_	-2.94
c21099_g1	sulfate adenylyltransferase [Fusarium verticillioides 7600]	sat, met3	-2.95
c19791_g1	hypothetical protein FVEG_11329 [Fusarium verticillioides 7600]	_	-2.95
c20953_g1	hypothetical protein FVEG_12091 [Fusarium verticillioides 7600]	_	-2.96
c7750_g1	4-aminobutyrate aminotransferase [Fusarium verticillioides 7600]	ABAT	-2.97
c10820_g1	hypothetical protein FVEG_06630 [Fusarium verticillioides 7600]	_	-2.97
c8529_g1	quinate dehydrogenase [Fusarium verticillioides 7600]	QUIB, qa-3	-2.97
c1284_g1	hypothetical protein FVEG_13695 [Fusarium verticillioides 7600]	_	-2.97
c8376_g1	hypothetical protein FVEG_07476 [Fusarium verticillioides 7600]	_	-2.97
c3471_g1	hypothetical protein FVEG_13371 [Fusarium verticillioides 7600]	_	-2.97
c6110_g1	hypothetical protein FVEG_14921 [Fusarium verticillioides 7600]	_	-2.99
c2877_g1	H+/K+-exchanging ATPase [Fusarium verticillioides 7600]	ATP1A	-2.99
c790_g1	hypothetical protein FVEG_11310 [Fusarium verticillioides 7600]	_	-3
c19543_g1	alpha-glucosidase [Fusarium verticillioides 7600]	malZ	-3
c4757_g1	hypothetical protein FVEG_12172 [Fusarium verticillioides 7600]	_	-3.01
c18308_g1	putative sugar transporter [Fusarium hypothetical protein FVEG_09261 [Fusarium verticillioides 7600]	_	-3.04
c16441_g1	hsp88-like protein [Fusarium verticillioides 7600]	_	-3.04
c4760_g1	hypothetical protein FVEG_03593 [Fusarium verticillioides 7600]	_	-3.04
c16493_g1	sodium/potassium-transporting ATPase subunit alpha [Fusarium verticillioides 7600]	ATP1A	-3.05
c11018_g1	hypothetical protein FVEG_17277 [Fusarium verticillioides 7600]	_	-3.06
c4681_g1	NAD-specific glutamate dehydrogenase [Fusarium verticillioides 7600]	GDH2	-3.08
c1850_g2	hypothetical protein FVEG_10258 [Fusarium verticillioides 7600]	_	-3.09
c16056_g1	hypothetical protein FVEG_09875 [Fusarium verticillioides 7600]	_	-3.1
c3422_g1	biotin synthetase [Fusarium verticillioides 7600]	bioB	-3.11
c3962_g1	nitrate reductase (NADH) [Fusarium verticillioides 7600]	NR	-3.12
c13105_g1	uroporphyrin-III C-methyltransferase/precorrin-2 dehydrogenase/sirohydrochlorin ferrochelatase [Fusarium verticillioides 7600]	MET1	-3.13
c4975_g1	hypothetical protein FVEG_10174 [Fusarium verticillioides 7600]	_	-3.13
c1124_g1	NADPH2:quinone reductase [Fusarium verticillioides 7600]	_	-3.16
c11064_g1	hypothetical protein FVEG_05966 [Fusarium verticillioides 7600]	HPD, hppD	-3.19
c7943_g1	Fum10p [Fusarium verticillioides]	_	-3.2
c21466_g1	endopolygalacturonase 1 [Fusarium verticillioides 7600]	E3.2.1.67	-3.2
c6015_g1	hypothetical protein FVEG_07257 [Fusarium verticillioides 7600]	_	-3.21
c18416_g1	hypothetical protein FVEG_11682 [Fusarium verticillioides 7600]	_	-3.22
c21861_g1	hypothetical protein FVEG_07664 [Fusarium verticillioides 7600]	_	-3.23
c6464_g2	hypothetical protein FVEG_11623 [Fusarium verticillioides 7600]	DHX8, PRP22	-3.28
c6164_g1	hypothetical protein FVEG_03214 [Fusarium verticillioides 7600]	_	-3.29
c4565_g1	hypothetical protein FVEG_11286 [Fusarium verticillioides 7600]	_	-3.3
c3750_g1	hypothetical protein FVEG_10172 [Fusarium verticillioides 7600]	_	-3.31
c2729_g1	hypothetical protein FVEG_15139 [Fusarium verticillioides 7600]	_	-3.32
c2071_g1	cell division cycle protein 37 [Fusarium verticillioides 7600]	CDC37	-3.33
c7724_g1	putative sugar transporter [Fusarium hypothetical protein FVEG_05690 [Fusarium verticillioides 7600]	_	-3.36
c5711_g1	oxidoreductase [Fusarium verticillioides 7600]	_	-3.36
c449_g1	hypothetical protein FVEG_09867 [Fusarium verticillioides 7600]	_	-3.41
c7121_g1	ATPase [Fusarium verticillioides 7600]	_	-3.44
c18523_g1	hypothetical protein FVEG_07433 [Fusarium verticillioides 7600]	_	-3.46
c18566_g1	hypothetical protein FVEG_16921 [Fusarium verticillioides 7600]	_	-3.47
c128_g1	hypothetical protein FVEG_10719 [Fusarium verticillioides 7600]	_	-3.47
c2188_g1	hypothetical protein FVEG_00155 [Fusarium verticillioides 7600]	_	-3.48
c1368_g1	hypothetical protein FVEG_06280 [Fusarium verticillioides 7600]	_	-3.48
c2032_g1	endo-polygalacturonase [Fusarium endo-polygalacturonase [Fusarium verticillioides]	E3.2.1.15	-3.49
c823_g1	phosphatidylethanolamine N-methyltransferase [Fusarium verticillioides 7600]	CHO2	-3.51
c6387_g1	hypothetical protein FVEG_01638 [Fusarium verticillioides 7600]	_	-3.51
c2270_g1	hypothetical protein FVEG_03646 [Fusarium verticillioides 7600]	SLC25A3, PHC, PIC	-3.51
c19656_g1	hypothetical protein FVEG_10844 [Fusarium verticillioides 7600]	_	-3.51
c19234_g1	hypothetical protein FVEG_11848 [Fusarium verticillioides 7600]	_	-3.53
c18314_g1	hypothetical protein FVEG_14049 [Fusarium verticillioides 7600]	_	-3.55
c21540_g1	hypothetical protein FVEG_16512 [Fusarium verticillioides 7600]	_	-3.55
c3054_g1	hypothetical protein FVEG_10370 [Fusarium verticillioides 7600]	YAT	-3.56
c10992_g1	hypothetical protein FVEG_11874 [Fusarium verticillioides 7600]	_	-3.56
c7930_g1	hypothetical protein FVEG_00156 [Fusarium verticillioides 7600]	K07119	-3.58
c3827_g1	hypothetical protein FVEG_11848 [Fusarium verticillioides 7600]	_	-3.58
c6743_g1	nitrite reductase [NAD(P)H]	NIT-6	-3.59
c10918_g1	hypothetical protein FVEG_06005 [Fusarium verticillioides 7600]	HXT	-3.64
c5701_g1	hypothetical protein FVEG_03384 [Fusarium verticillioides 7600]	_	-3.65
c21449_g1	hypothetical protein FVEG_02343 [Fusarium verticillioides 7600]	_	-3.68
c5967_g1	hypothetical protein FVEG_07831 [Fusarium verticillioides 7600]	_	-3.69
c18331_g1	nitric oxide dioxygenase [Fusarium verticillioides 7600]	hmp, YHB1	-3.7
c870_g1	putative sugar transporter [Fusarium MFS transporter, SP family, major inositol transporter [Fusarium verticillioides 7600]	_	-3.71
c11076_g1	hypothetical protein FVEG_13174 [Fusarium verticillioides 7600]	_	-3.71
c14087_g1	hypothetical protein FVEG_10964 [Fusarium verticillioides 7600]	_	-3.72
c8223_g1	hypothetical protein FVEG_06631 [Fusarium verticillioides 7600]	_	-3.75
c5262_g1	hypothetical protein FVEG_12677 [Fusarium verticillioides 7600]	E3.5.1.4, amiE	-3.76
c14587_g1	hypothetical protein FVEG_06519 [Fusarium verticillioides 7600]	_	-3.77
c1151_g1	hsp70-like protein [Fusarium verticillioides 7600]	HSPA1_8	-3.78
c18079_g1	hypothetical protein FVEG_05303 [Fusarium verticillioides 7600]	_	-3.78
c18579_g1	hypothetical protein FVEG_10636 [Fusarium verticillioides 7600]	_	-3.79
c21201_g1	hypothetical protein FVEG_01644 [Fusarium verticillioides 7600]	_	-3.82
c31_g1	MFS transporter, SP family, sugar:H+ symporter [Fusarium verticillioides 7600]	HXT	-3.83
c3746_g1	hypothetical protein FVEG_04916 [Fusarium verticillioides 7600]	_	-3.84
c5049_g1	succinate-semialdehyde dehydrogenase [Fusarium verticillioides 7600]	gabD	-3.85
c7509_g1	tRNA-dihydrouridine synthase 1 [Fusarium verticillioides 7600]	DUS1	-3.85
c13272_g1	hypothetical protein FVEG_10867 [Fusarium verticillioides 7600]	_	-3.85
c10395_g1	hypothetical protein FVEG_12092 [Fusarium verticillioides 7600]	_	-3.88
c5848_g2	hypothetical protein FVEG_11142 [Fusarium verticillioides 7600]	_	-3.88
c11149_g1	hypothetical protein FVEG_08831 [Fusarium verticillioides 7600]	_	-3.9
c10182_g1	hypothetical protein FVEG_09897 [Fusarium verticillioides 7600]	_	-3.91
c4849_g1	hypothetical protein FVEG_03764 [Fusarium verticillioides 7600]	_	-3.97
c4758_g1	hypothetical protein FVEG_15469 [Fusarium verticillioides 7600]	_	-3.99
c20875_g1	molecular chaperone HtpG [Fusarium verticillioides 7600]	htpG, HSP90A	-4.06
c10280_g1	hypothetical protein FVEG_13581 [Fusarium verticillioides 7600]	_	-4.08
c18817_g1	hypothetical protein FVEG_17357 [Fusarium verticillioides 7600]	_	-4.1
c3673_g1	quinate permease [Fusarium verticillioides 7600]	_	-4.14
c5539_g1	hypothetical protein FVEG_12924 [Fusarium verticillioides 7600]	_	-4.2
c5567_g1	hypothetical protein FVEG_10717 [Fusarium verticillioides 7600]	AL1	-4.21
c5062_g1	hypothetical protein FVEG_00098 [Fusarium verticillioides 7600]	_	-4.21
c5167_g1	hypothetical protein FVEG_17560 [Fusarium verticillioides 7600]	_	-4.25
c4793_g1	hypothetical protein FVEG_10697 [Fusarium verticillioides 7600]	_	-4.3
c4764_g1	carboxylesterase 1 [Fusarium verticillioides 7600]	AXE1	-4.31
c19535_g1	hypothetical protein FVEG_12093 [Fusarium verticillioides 7600]	GLO1, gloA	-4.31
c758_g1	alcohol dehydrogenase (NADP+) [Fusarium verticillioides 7600]	_	-4.37
c10705_g1	hypothetical protein FVEG_11699 [Fusarium verticillioides 7600]	_	-4.37
c18357_g1	thioredoxin 1 [Fusarium verticillioides 7600]	trxA	-4.38
c11052_g1	hypothetical protein FVEG_04447 [Fusarium verticillioides 7600]	_	-4.4
c5494_g1	alcohol dehydrogenase [Fusarium verticillioides 7600]	_	-4.43
c1138_g1	nitrate reductase [NADPH]	NR	-4.49
c4429_g1	hypothetical protein FVEG_12614 [Fusarium verticillioides 7600]	_	-4.55
c18416_g2	hypothetical protein FVEG_11683 [Fusarium verticillioides 7600]	K09983	-4.56
c1368_g2	hypothetical protein FVEG_06280 [Fusarium verticillioides 7600]	_	-4.61
c10475_g1	MFS transporter, SP family, general alpha glucoside:H+ symporter [Fusarium verticillioides 7600]	MAL	-4.66
c13098_g1	alpha-N-arabinofuranosidase B [Fusarium verticillioides 7600]	_	-5.02
c10255_g1	DnaJ like subfamily B member 4 [Fusarium verticillioides 7600]	DNAJB4	-5.03
c11231_g1	acid phosphatase [Fusarium verticillioides 7600]	E3.1.3.2	-5.07
c1925_g1	L-lactate dehydrogenase (cytochrome) [Fusarium verticillioides 7600]	_	-5.25
c4588_g1	hypothetical protein FVEG_05607 [Fusarium verticillioides 7600]	_	-5.42
c7062_g1	hexokinase [Fusarium verticillioides 7600]	HK	-5.65
c3288_g2	hypothetical protein FVEG_06592 [Fusarium verticillioides 7600]	_	-5.75
c128_g2	hypothetical protein FVEG_10719 [Fusarium verticillioides 7600]	_	-5.75
c13398_g1	MFS transporter, FHS family, L-fucose permease [Fusarium verticillioides 7600]	fucP	-5.79
c11360_g1	hypothetical protein FVEG_09851 [Fusarium verticillioides 7600]	_	-5.84
c18030_g2	hsp98-like protein [Fusarium verticillioides 7600]	_	-5.98
c1997_g1	hypothetical protein FVEG_12727 [Fusarium verticillioides 7600]	_	-6.16
c15635_g1	hypothetical protein FVEG_08606 [Fusarium verticillioides 7600]	_	-6.31
c2047_g1	hypothetical protein FVEG_16920 [Fusarium verticillioides 7600]	_	-6.42
c15662_g1	Cu2+-exporting ATPase [Fusarium verticillioides 7600]	copB	-7.25
c20832_g1	hypothetical protein FVEG_01283 [Fusarium verticillioides 7600]	_	-8.24
c18023_g1	hypothetical protein FVEG_11780 [Fusarium verticillioides 7600]	_	-8.77

## Sheet: Supplementary Table 4
Supplementary Table 4. Genes of strain FKM10 related to spore formation and germination under co-cultivated condition with F. verticillioides
Gene Id	Putative function	Gene name	log2 FC
Spore formation related genes
ATE50_RS06990	stage II sporulation protein B	spoIIB	5.54
ATE50_RS00115	stage II sporulation protein E	spoIIE	3.43
ATE50_RS08810	anti-sigma F factor	spoIIAB	4.34
ATE50_RS08815	RNA polymerase sporulation sigma factor SigF	sigF	4.2
ATE50_RS08805	anti-sigma F factor antagonist	spoIIAA	4.24
ATE50_RS11960	sigma-E processing peptidase SpoIIGA	spoIIGA	3.92
ATE50_RS11955	RNA polymerase sporulation sigma factor SigE	SigE	3.56
ATE50_RS11950	RNA polymerase sporulation sigma factor SigG	SigG	3.57
ATE50_RS08315	sporulation transcription factor Spo0A	spo0A	2.87
ATE50_RS07590	RNA polymerase sporulation sigma factor SigK	sigK	-1.83
ATE50_RS08220	stage III sporulation protein AC	spoIIIAC	-2.67
ATE50_RS08210	stage III sporulation protein AA	spoIIIAA	-1.99
ATE50_RS02690	sporulation transcriptional regulator SpoIIID	spoIIID	-3.02
ATE50_RS11110	stage V sporulation protein S	spoVS	2.09
ATE50_RS13345	aspartate phosphatase	rapA, spo0L	2.17
ATE50_RS12610	PAS domain-containing sensor histidine kinase	kinA	1.65
Spore germination related genes
ATE50_RS04455	spore gernimation protein	gerAB	-2.71
ATE50_RS04450	germination protein	gerAC	-2.33
ATE50_RS03015	spore gernimation protein GerA	gerBC	-2.03
ATE50_RS02955	hypothetical protein		-2.05
ATE50_RS17560	spore germination protein	gerKA	-3.12
ATE50_RS00260	AbrB/MazE/SpoVT family DNA-binding domain-containing protein	abrB	-3.11
